# Supplementary material for: Spin state modulation and kinetic control of thermal contraction in a [Fe2Co2] discrete Prussian blue analogue
Source: Royal Society of Chemistry journal article supplement (doi:10.1039/d4sc05792a), 2024-11-13
Supplement: d4sc05792a1.pdf [file d4sc05792a1.pdf]

## Supporting information Figures

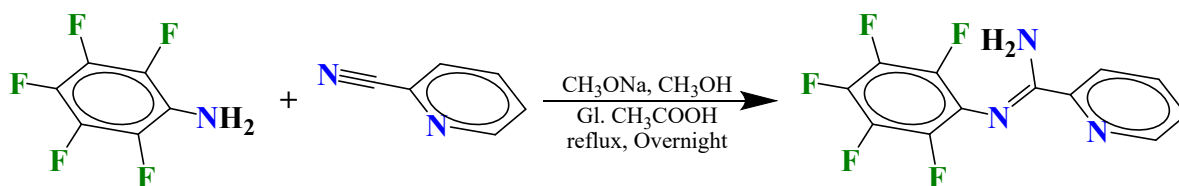

**Scheme S1.** Synthesis of ligand ((F5-Bn)Py), (L).

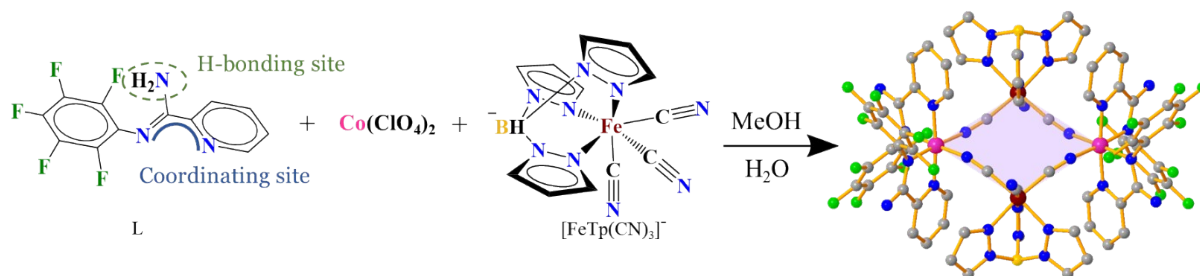

**Scheme S2.** Synthesis of  $[\text{Fe}(\text{Tp})(\text{CN})_3]_2[\text{Co}\{\text{L}\}_2(\text{ClO}_4)_2] \cdot 4\text{MeOH} \cdot 2\text{H}_2\text{O}$  (**1**·4MeOH·2H<sub>2</sub>O).

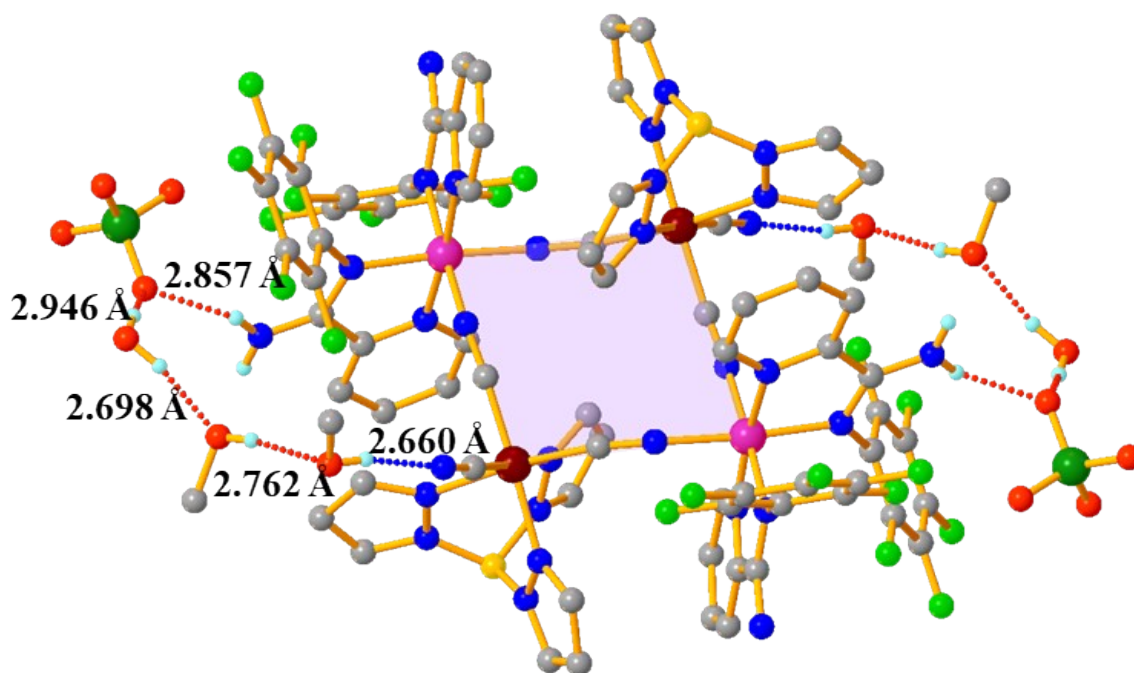

**Figure S1.** Crystal Structure of **1**·4MeOH·2H<sub>2</sub>O. Colour Code: Green: Fe; Pink: Co; Blue: N; Grey: C; Yellow: B, Dark green: Cl, Light green: F. H-bonding interactions between the square complex, solvents and anions are shown with red dotted lines. The hydrogen not involved in H-bonding is omitted for clarity.

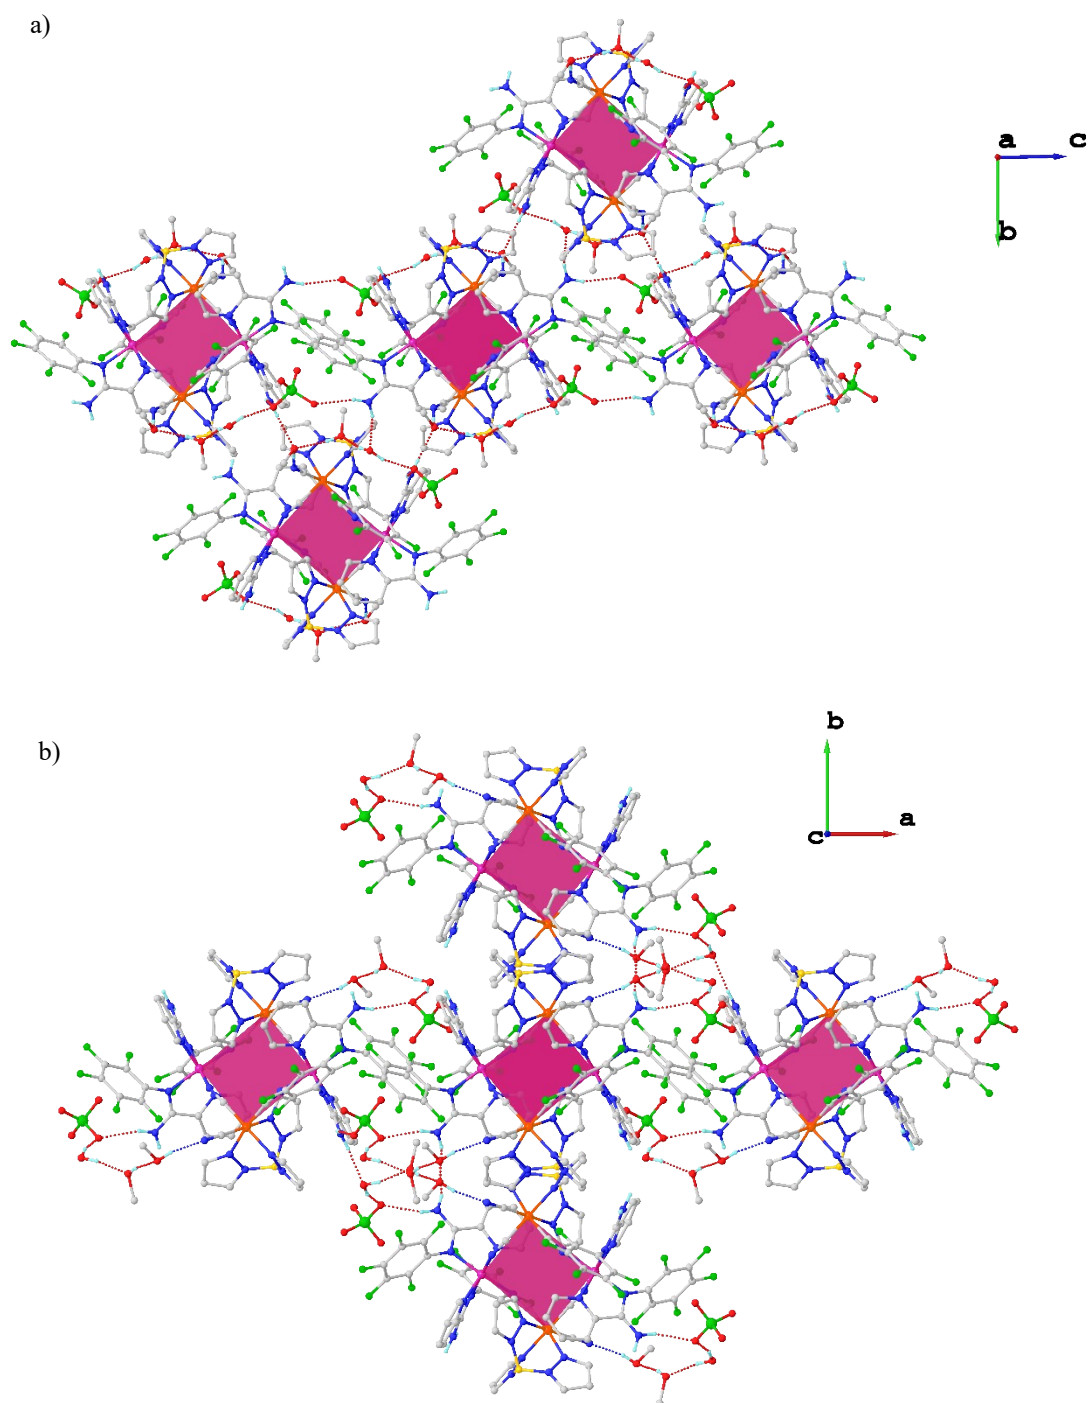

**Figure S2.** Hydrogen bonding interactions between solvent molecules, perchlorate anions and the  $[\text{Fe}_2(\mu\text{-CN})\text{Co}_2]$  square grids a) along the  $bc$  plane and b) along the  $ab$  plane in complex  $\mathbf{1} \cdot 4\text{MeOH} \cdot 2\text{H}_2\text{O}$ . The Hydrogen atoms not involved in Hydrogen bonding have been omitted for clarity.

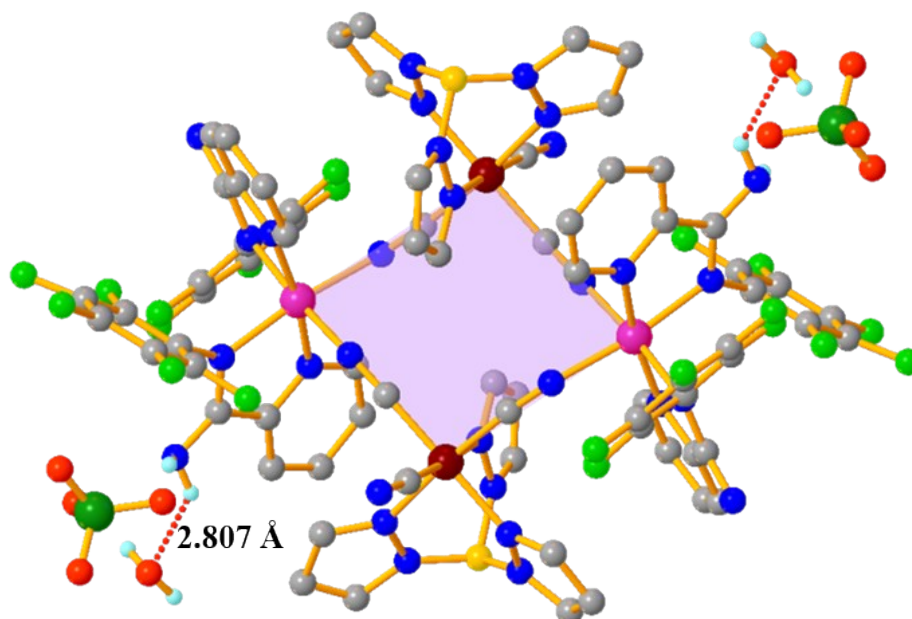

**Figure S3.** Crystal Structure of  $1 \cdot 2\text{H}_2\text{O}$ . Colour Code: Green: Fe; Pink: Co; Blue: N; Grey: C; Yellow: B, Dark green: Cl, Light green: F. H-bonding interactions between the square complex, solvents and anions are shown with red dotted lines. The hydrogen not involved in H-bonding is omitted for clarity.

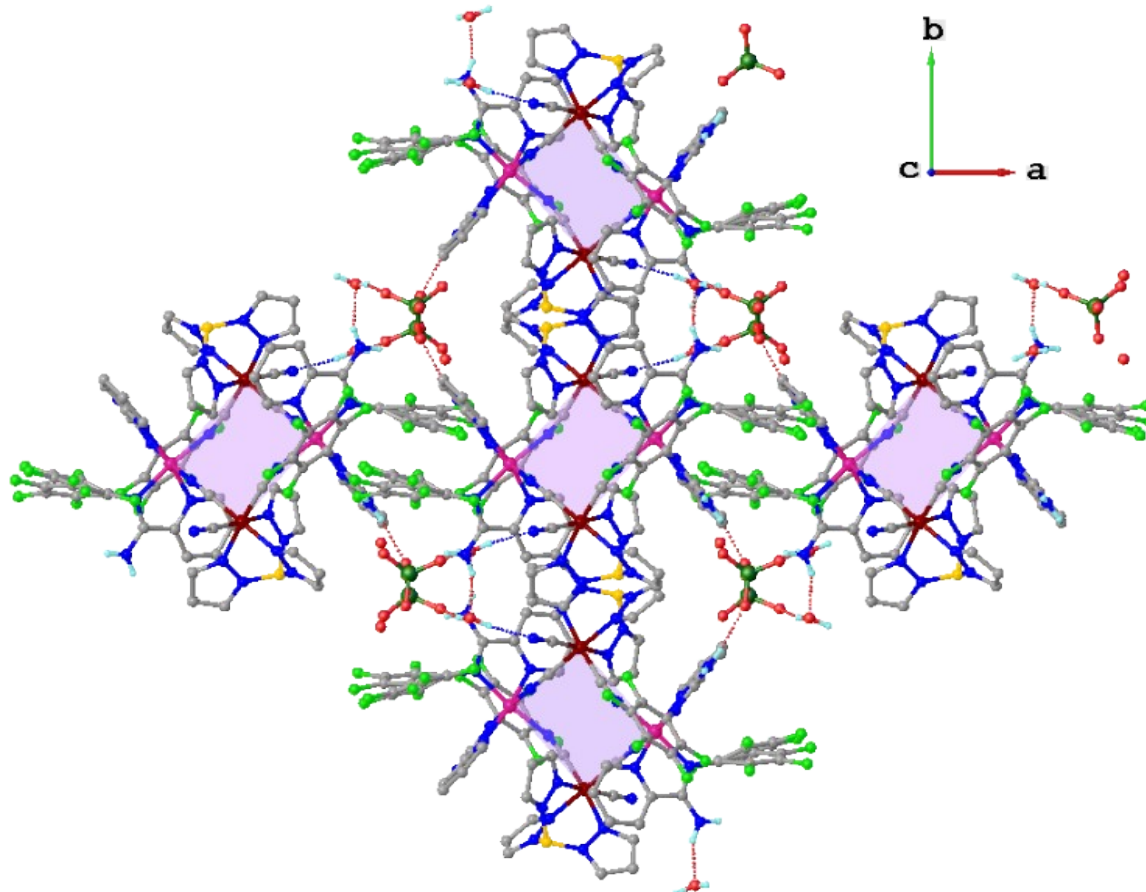

**Figure S4.** Hydrogen bonding interactions between solvent molecules, perchlorate anions and the  $[\text{Fe}_2(\mu\text{-CN})\text{Co}_2]$  square grids along the  $ab$  plane in complex  $1 \cdot 2\text{H}_2\text{O}$ . The Hydrogen atoms not involved in Hydrogen bonding have been omitted for clarity.

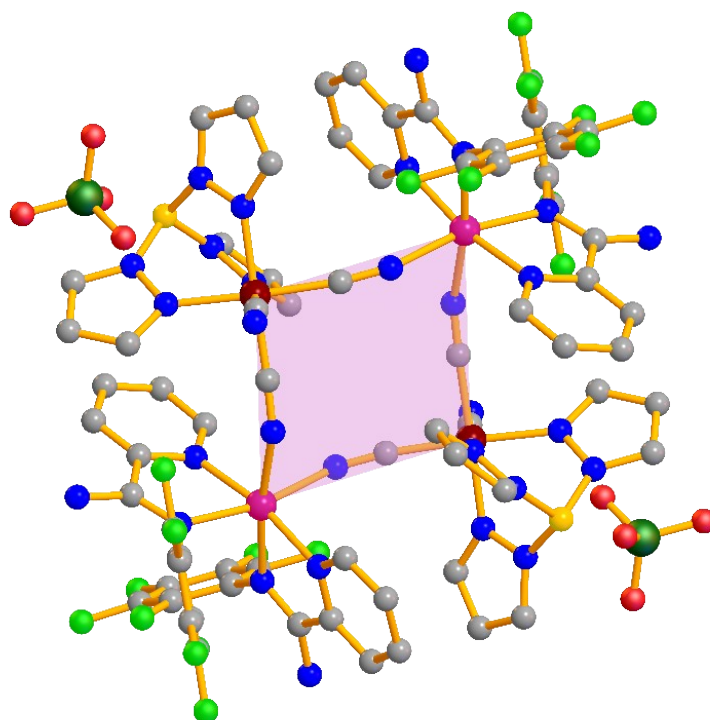

**Figure S5.** Crystal Structure of **1**. Colour Code: Green: Fe; Pink: Co; Blue: N; Grey: C; Yellow: B, Dark green: Cl, Light green: F. The hydrogen not involved in H-bonding is omitted for clarity.

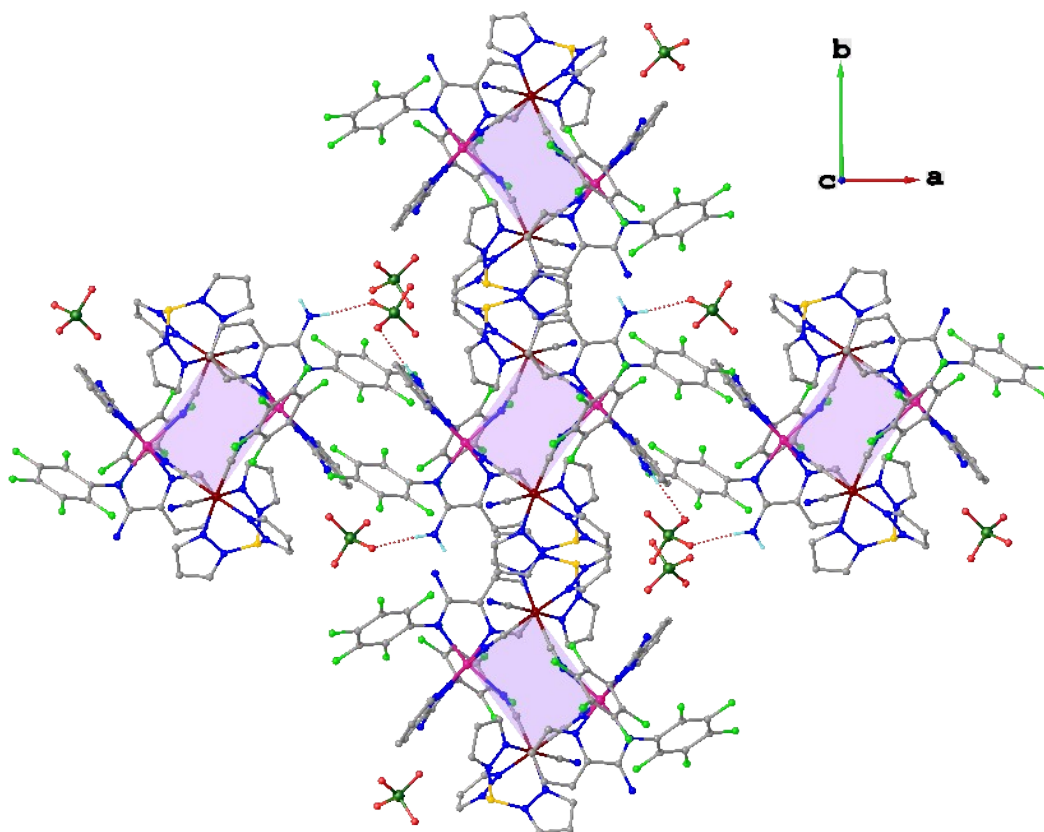

**Figure S6.** Hydrogen bonding interactions between solvent molecules, perchlorate anions and the  $[\text{Fe}_2(\mu\text{-CN})\text{Co}_2]$  square grids along the *ab* plane in complex **1**. The Hydrogen atoms not involved in Hydrogen bonding have been omitted for clarity.

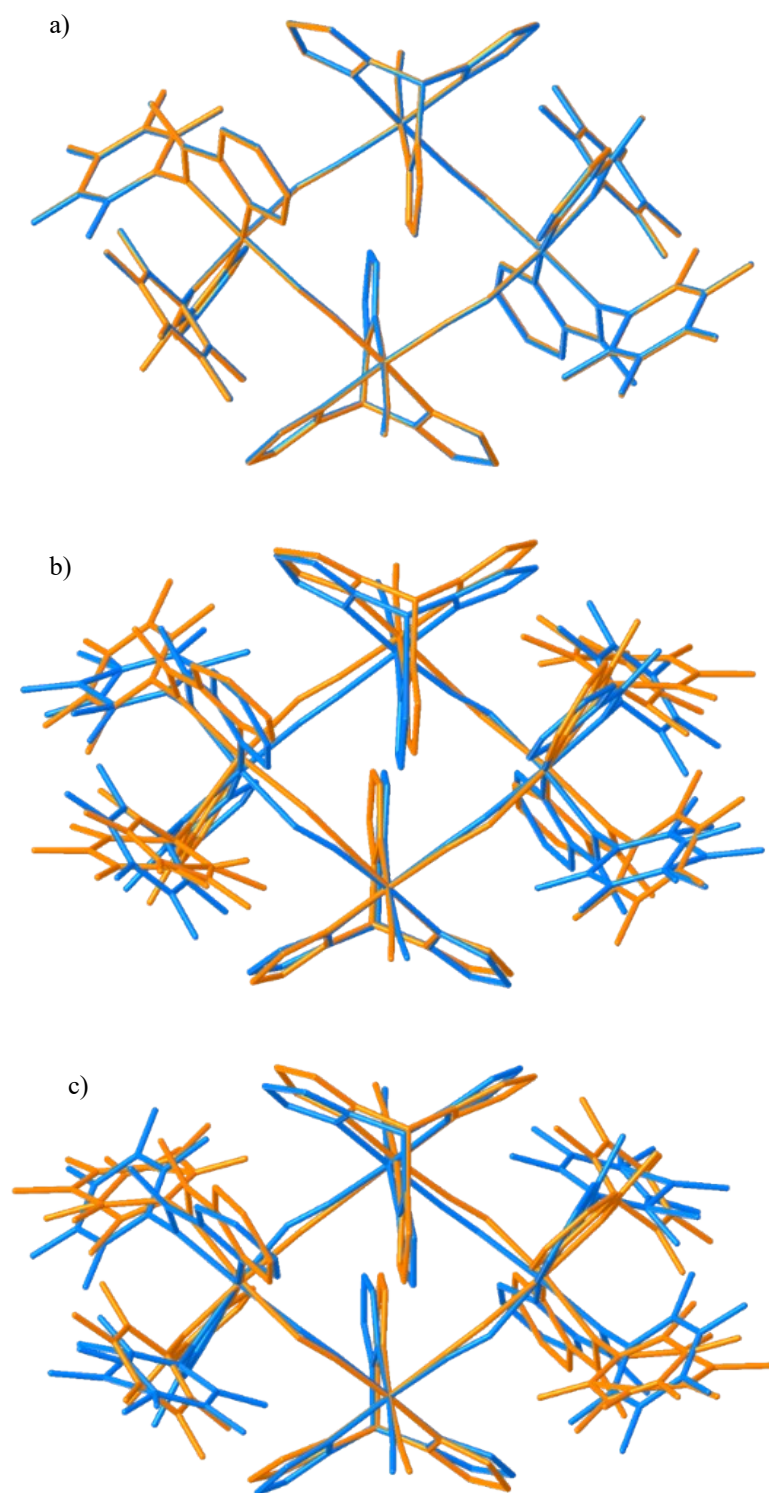

**Figure S7.** Overlay diagram of a)  $1 \cdot 4\text{MeOH} \cdot 2\text{H}_2\text{O}$  (blue: 100 K, orange: 200 K) and b)  $1 \cdot 2\text{H}_2\text{O}$  (blue: 140 K, orange: 200 K) and c)  $1 \cdot 2\text{H}_2\text{O}$  (blue: 140 K, orange: 110 K). The Hydrogen atoms are omitted for clarity.

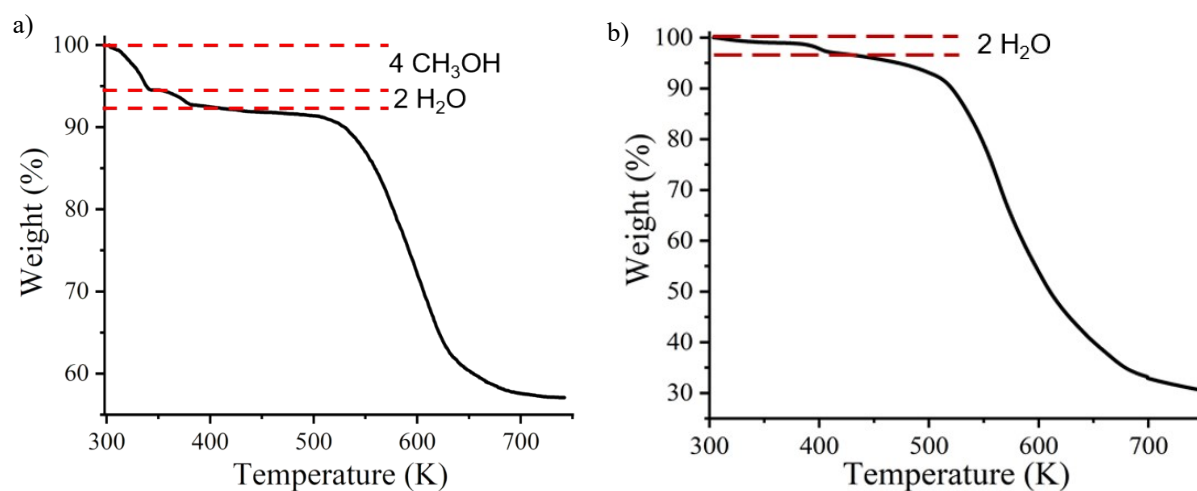

**Figure S8.** Thermogravimetric analysis of a)  $1 \cdot 4\text{MeOH} \cdot 2\text{H}_2\text{O}$ , b)  $1 \cdot 2\text{H}_2\text{O}$  and c) **1** representing loss of solvent molecules.

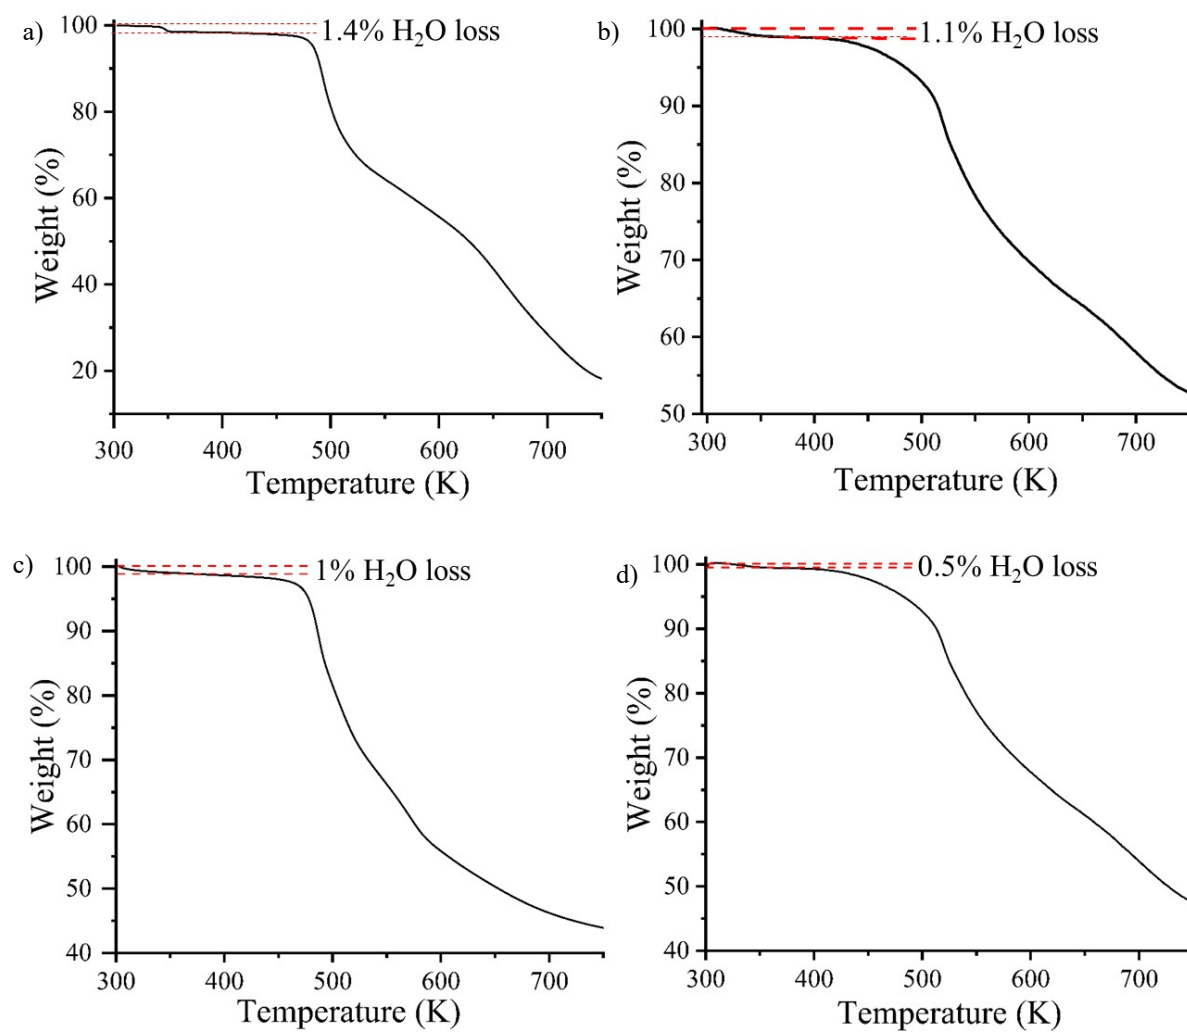

**Figure S9.** Thermogravimetric analysis of  $1 \cdot 2\text{H}_2\text{O}$  after a) 2 days, b) 1 week, c) 2 weeks and d) 4 weeks.

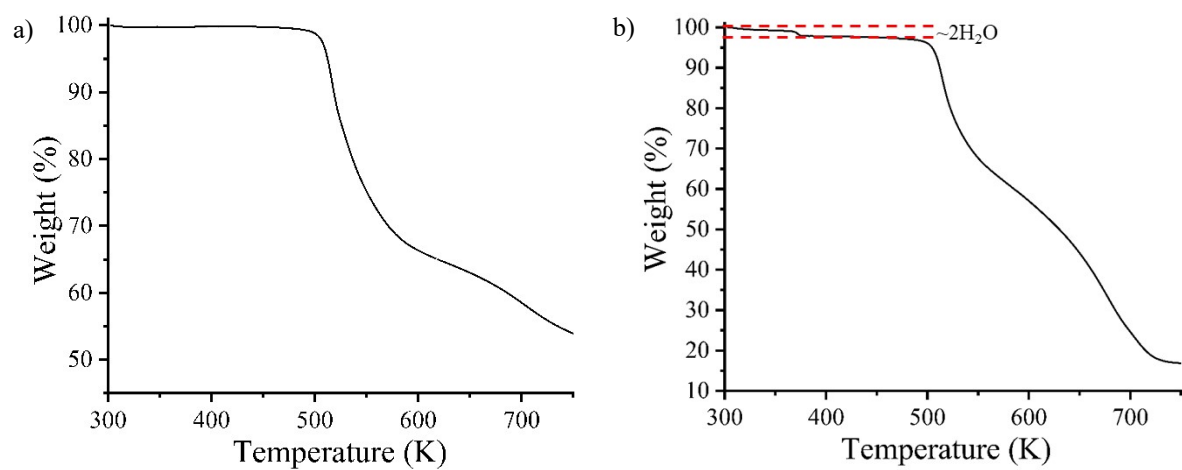

**Figure S10.** Thermogravimetric analysis of **1** (a) and resolvated complex (b).

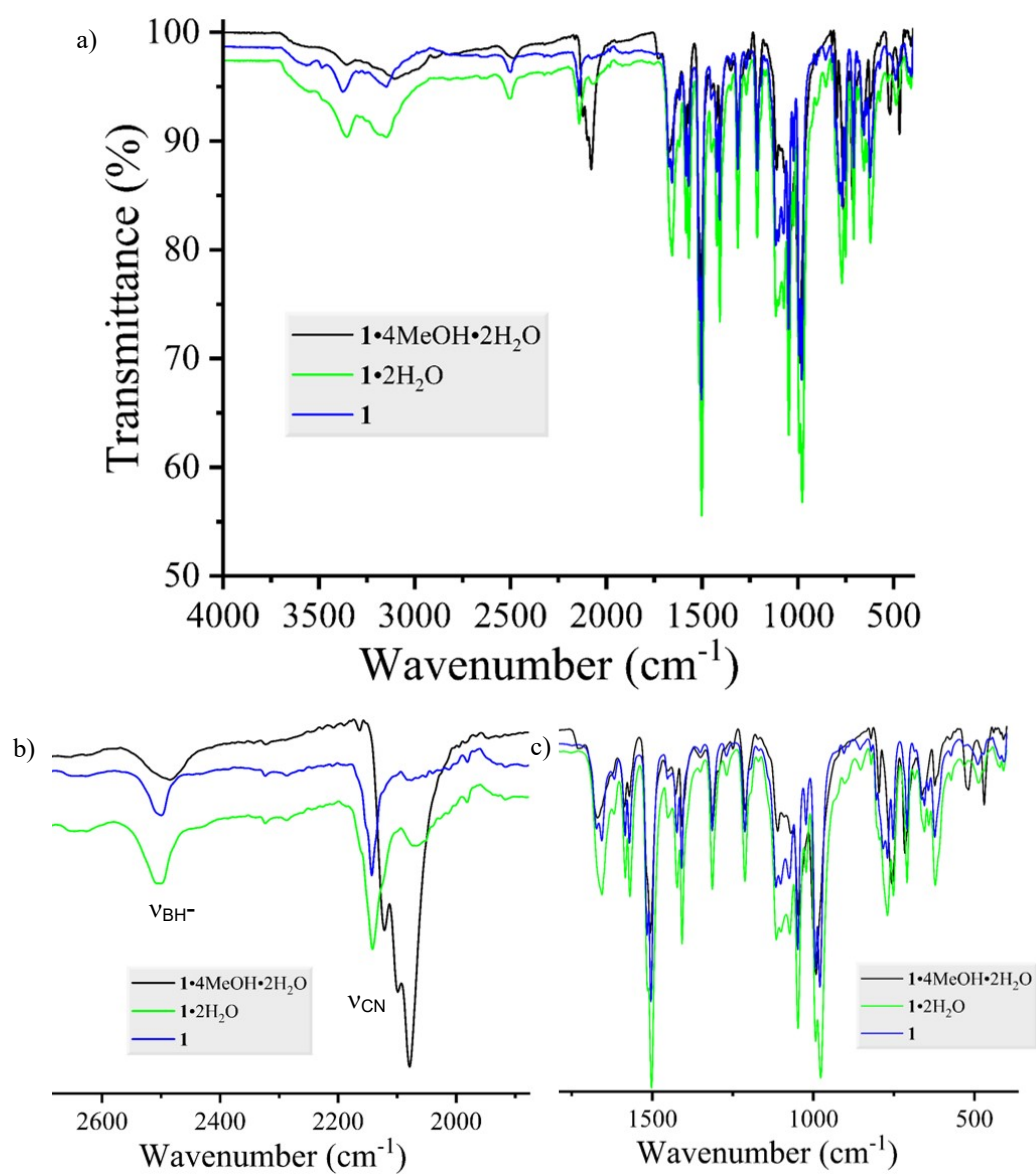

**Figure S11.** a) Infrared spectroscopy of  $1 \cdot 4\text{MeOH} \cdot 2\text{H}_2\text{O}$ ,  $1 \cdot 2\text{H}_2\text{O}$  and  $1$ . Enlarged view of b)  $\text{BH}^+$  and CN frequency region and c) 1750 – 400  $\text{cm}^{-1}$ .

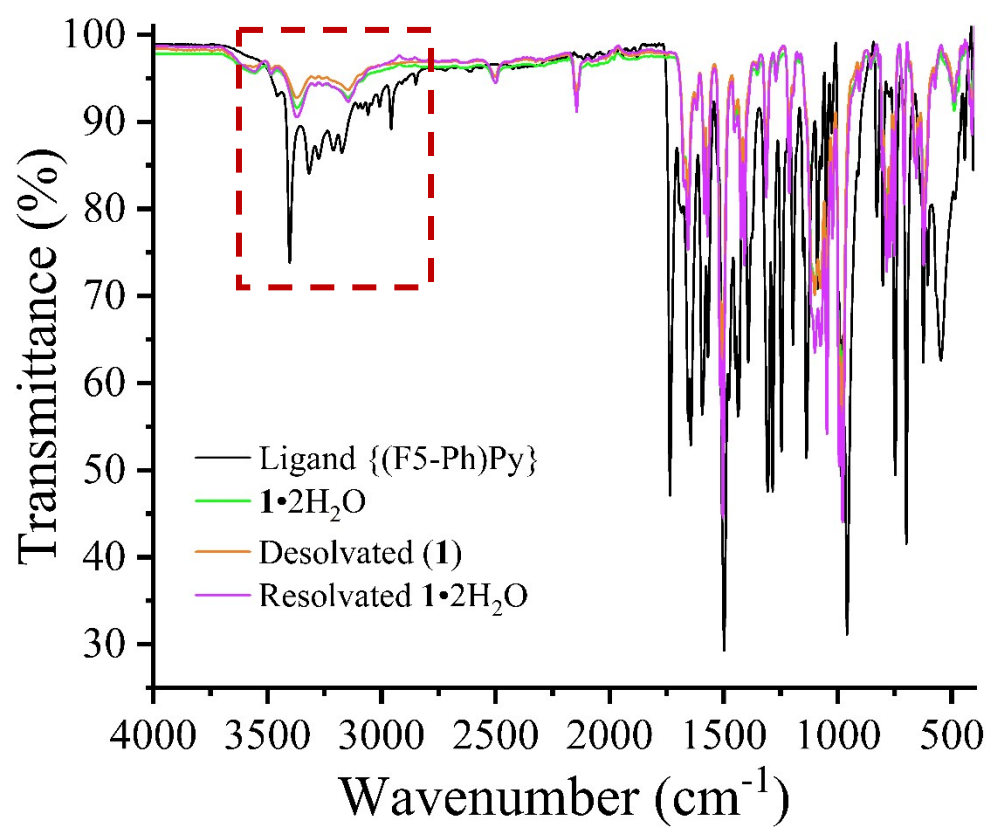

**Figure S12.** Infrared spectroscopy of ligand, 1•2H<sub>2</sub>O, desolvated and the resolvated complex.

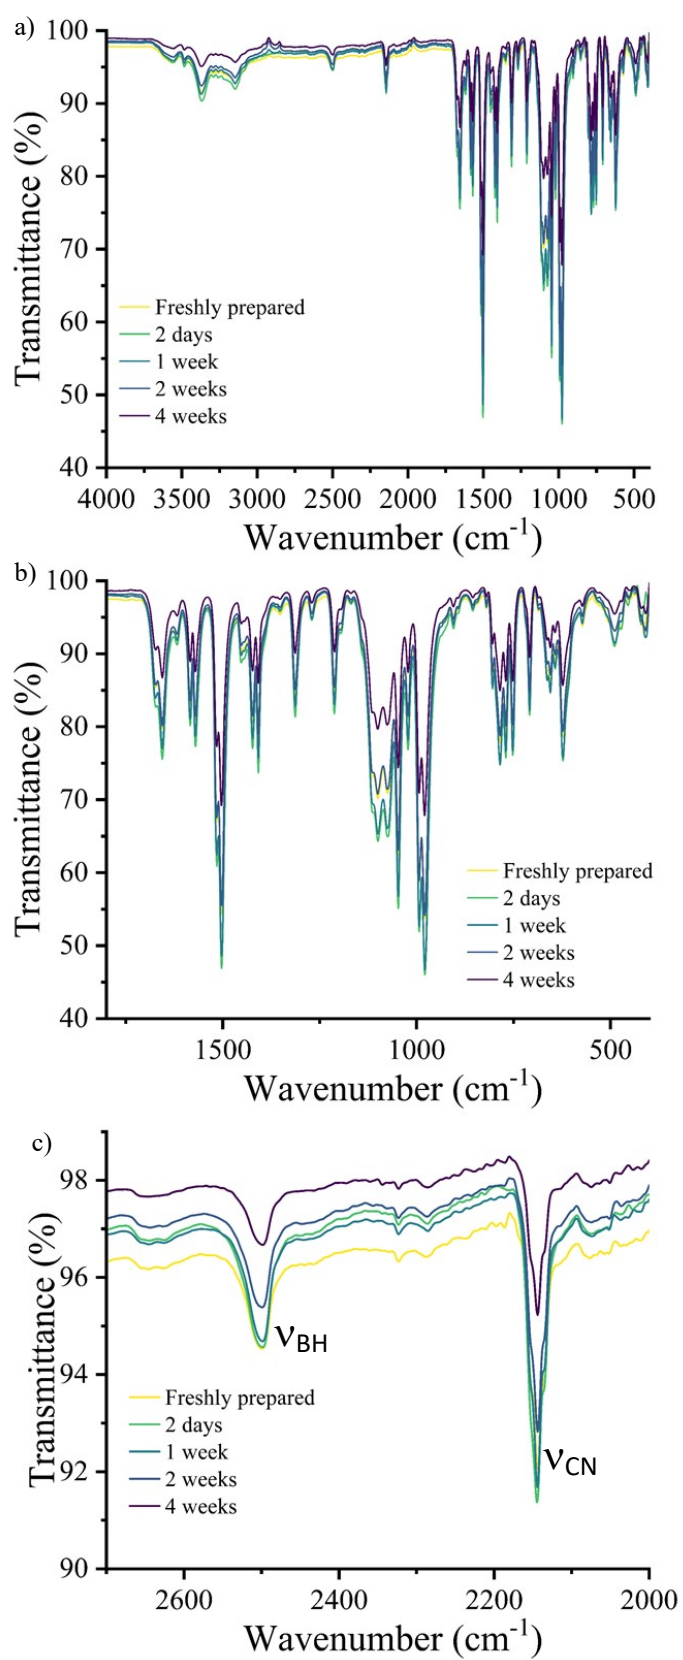

**Figure S13.** Infrared spectroscopy of  $1 \cdot 2\text{H}_2\text{O}$  with ageing a) complete spectra from 4000-400  $\text{cm}^{-1}$ , b) fingerprint region (1800-400  $\text{cm}^{-1}$ ), and c)  $\nu_{\text{BH}}$  and  $\nu_{\text{CN}}$  stretching frequencies.

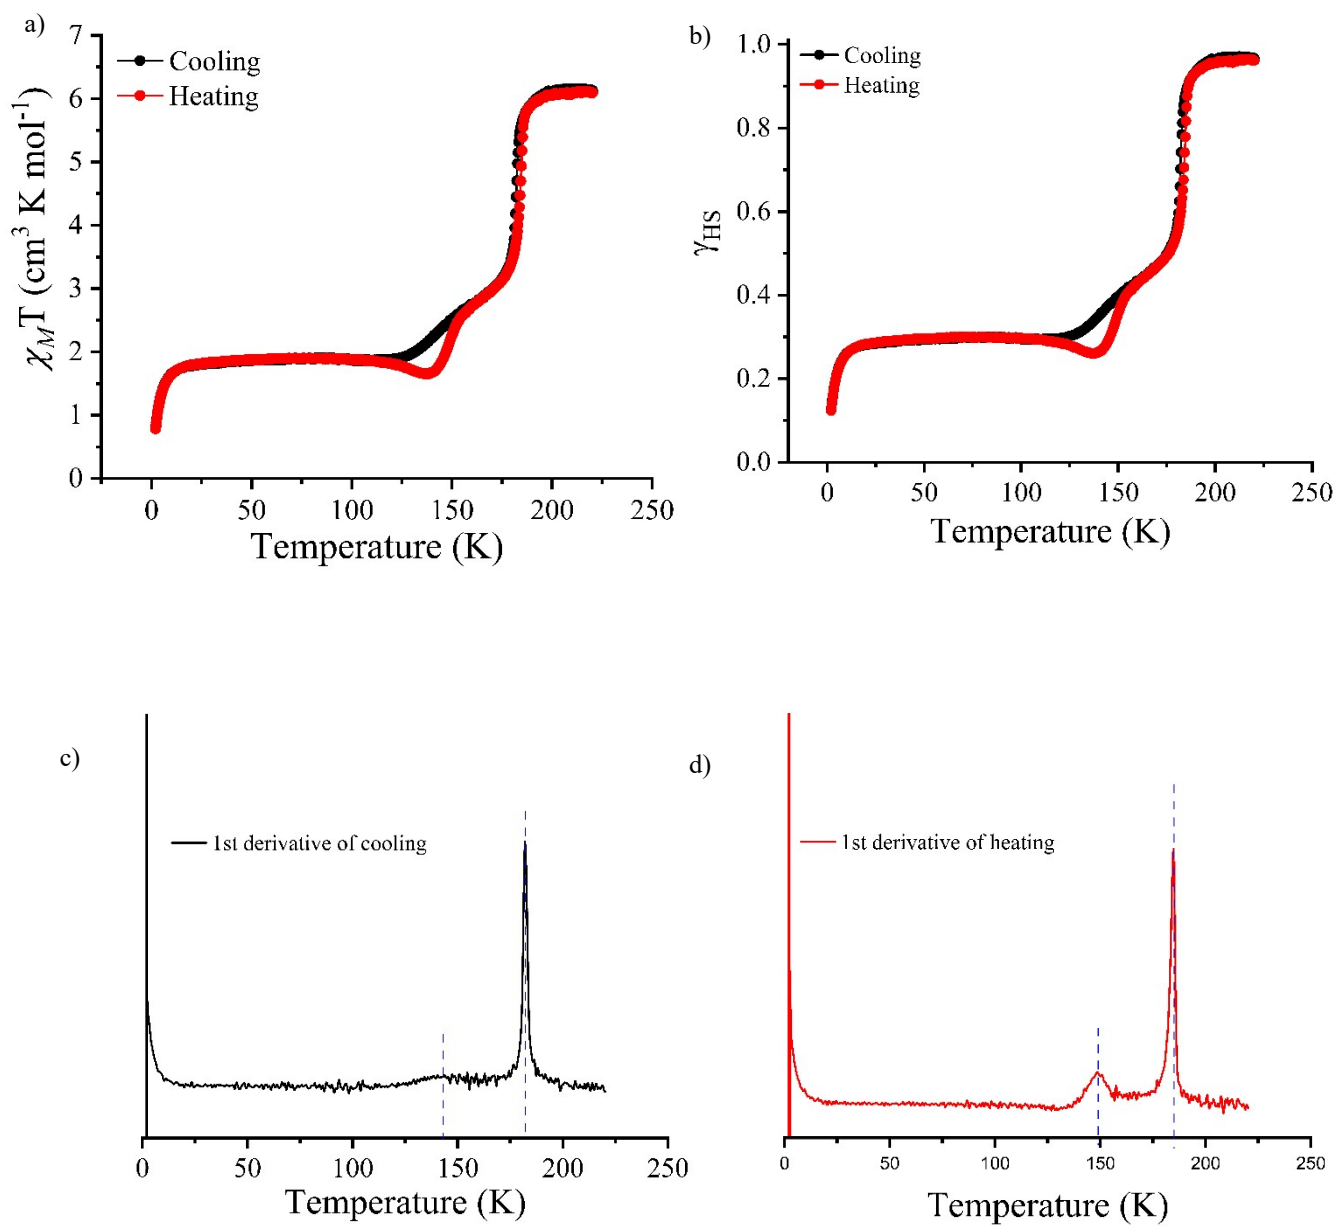

**Figure S14.** a)  $\chi_M T$  vs. T (black), b)  $\gamma_{\text{HS}}$  vs. T and c) and d) are the derivative plots during cooling and heating, respectively, for complex  $1 \cdot 2\text{H}_2\text{O}$  at  $5 \text{ K min}^{-1}$  with applied DC field of 1000 Oe. The separate derivative plot for the complex during the cooling and heating cycle (b and c, respectively).

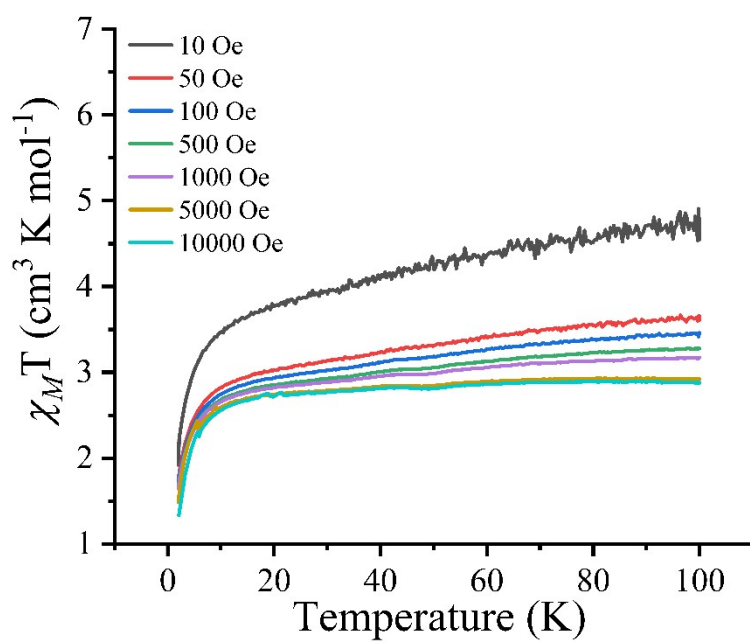

**Figure S15.**  $\chi_M T$  vs.  $T$  plots for complex  $1 \cdot 2\text{H}_2\text{O}$  at  $5 \text{ K min}^{-1}$  under different applied magnetic field from 10 Oe to 10000 Oe from 2-100 K.

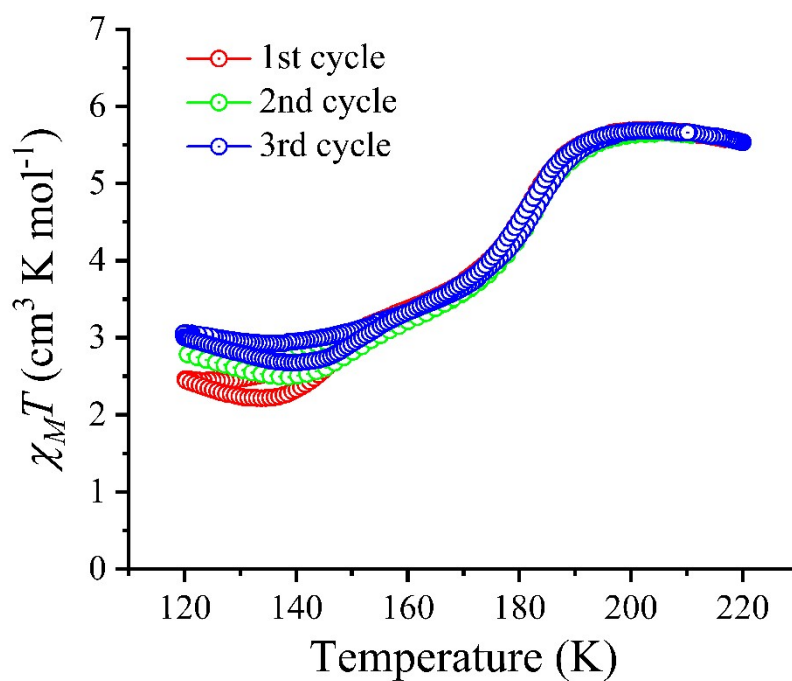

**Figure S16.**  $\chi_M T$  vs.  $T$  plot at a scan rate of  $5 \text{ K min}^{-1}$  for complex  $1 \cdot 2\text{H}_2\text{O}$  with three consecutive cycles upon resolution.

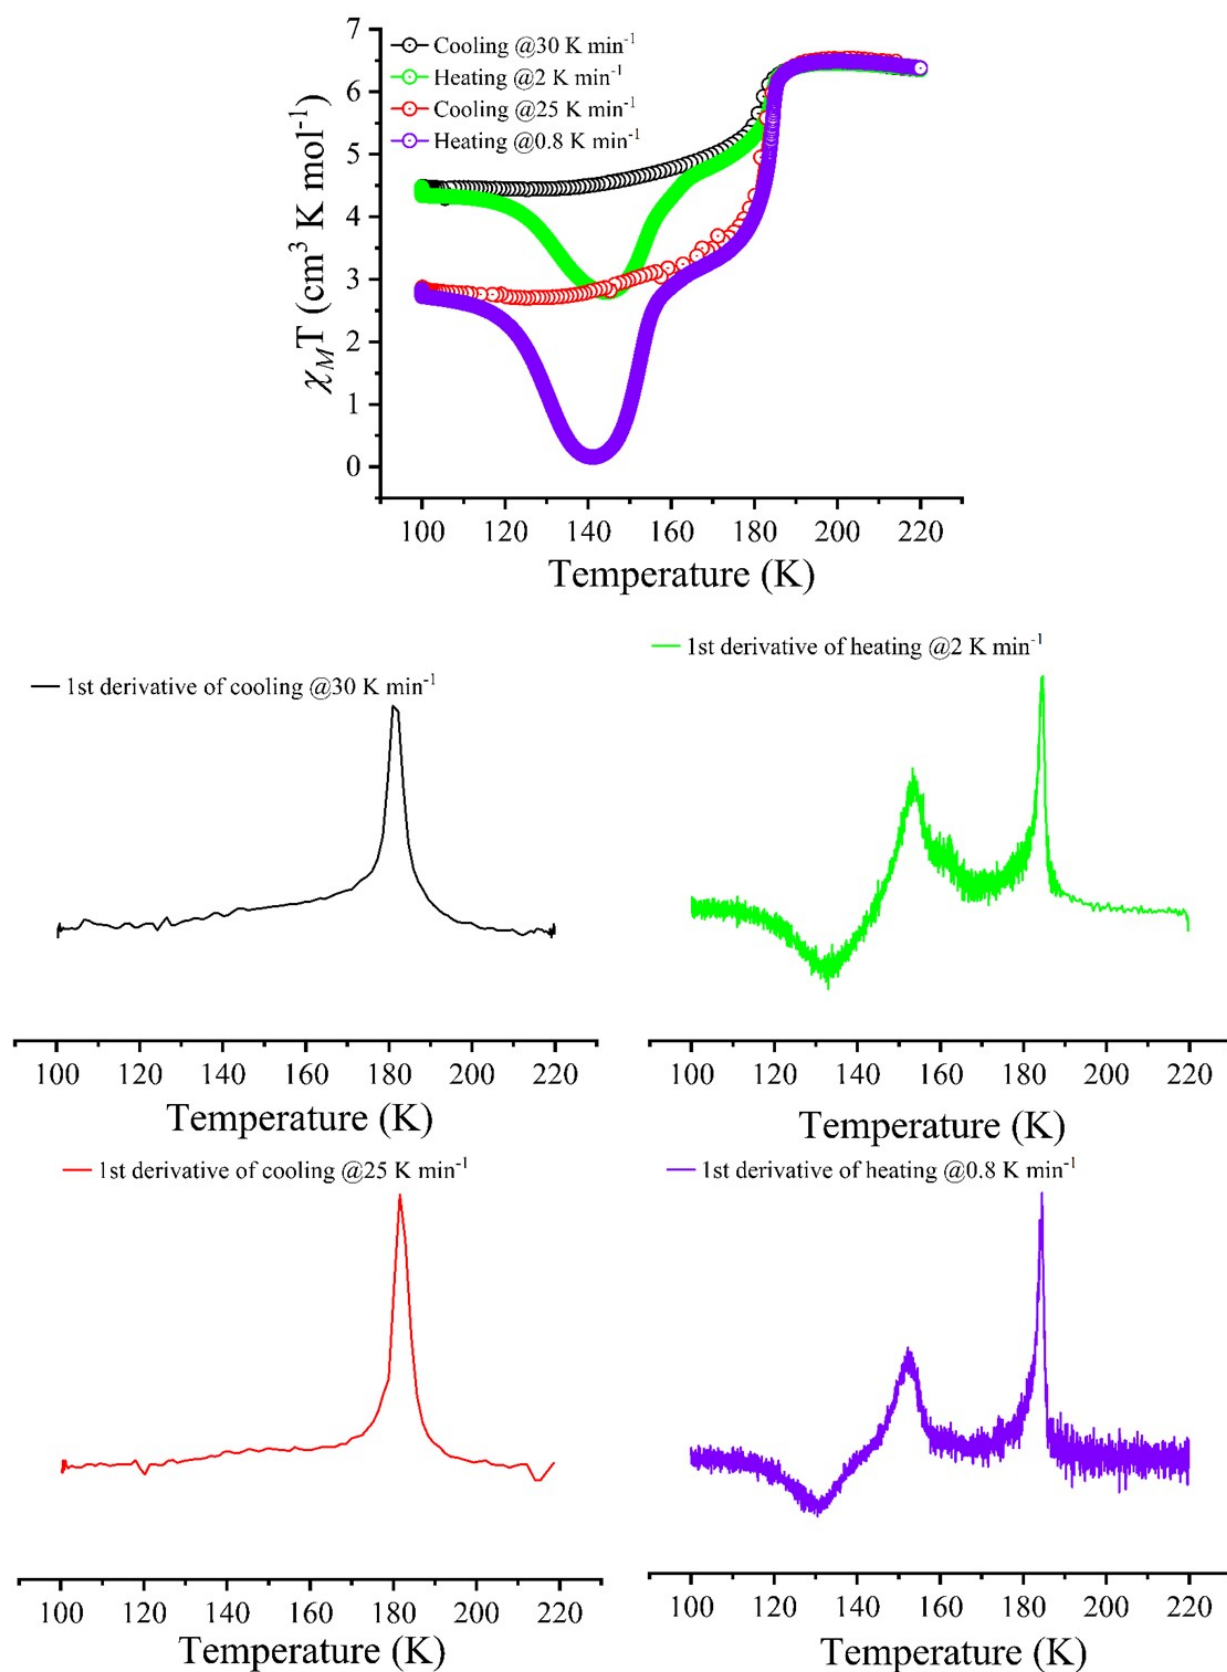

**Figure S17.**  $\chi_M T$  vs.  $T$  plots for complex **1**·2H<sub>2</sub>O upon thermal quenching with a scan rate of 25 K min<sup>-1</sup> (black) and 30 K min<sup>-1</sup> (red) via TIESST phenomenon. Heating was measured at a scan rate of 0.8 K min<sup>-1</sup> (black) and 2 K min<sup>-1</sup> (red). The 1<sup>st</sup> derivative plots during cooling and heating mode is shown in their representative colours with single-step and two-step transitions, respectively.

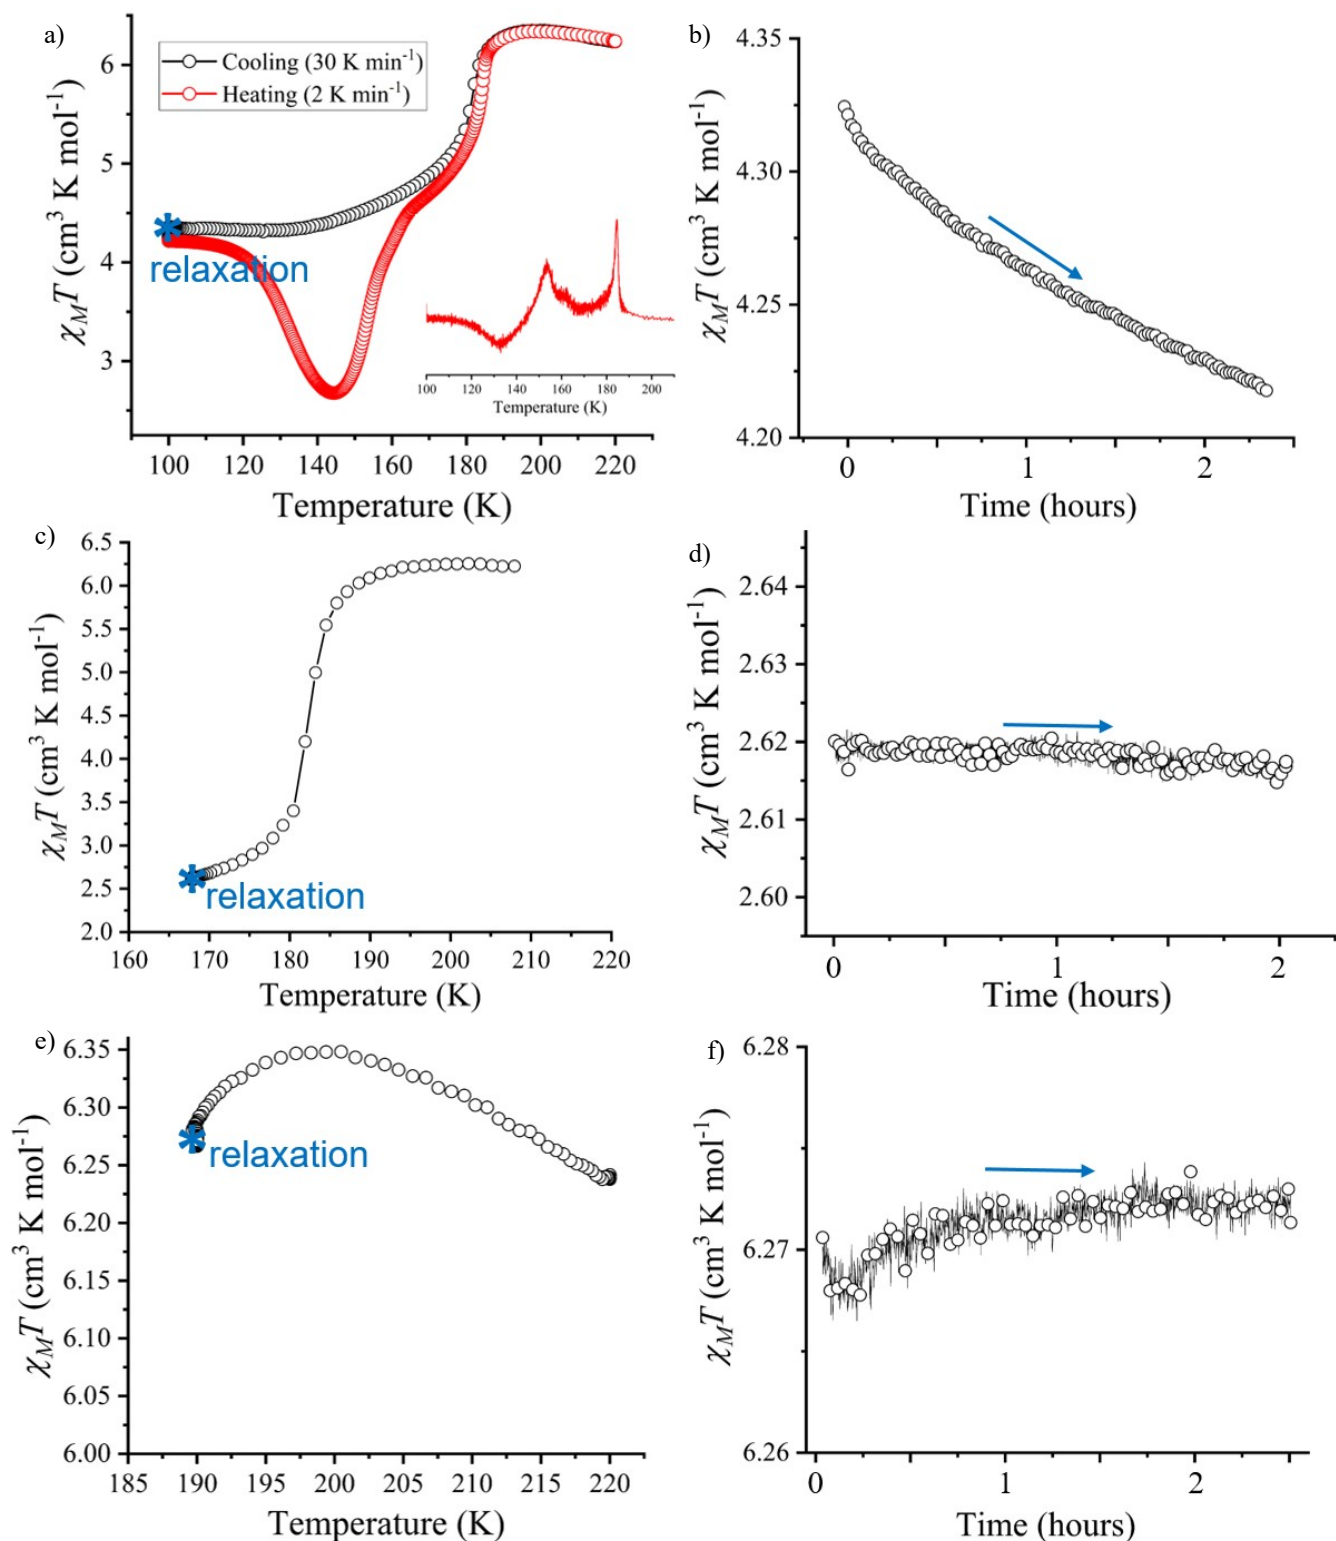

**Figure S18.**  $\chi_M T$  vs.  $T$  plots for complex  $1 \cdot 2H_2O$  upon thermal quenching with a scan rate of  $30 \text{ K min}^{-1}$  up to a) 100 K, c) 168 K and e) 190 K followed by relaxation for about 2 hours at constant temperatures. b), d) and f)  $\chi_M T$  vs. time plots at 100 K, 168 K and 190 K, respectively. Inset of a) shows the 1<sup>st</sup> derivative of heating cycle showing not so prominent three step-transition.

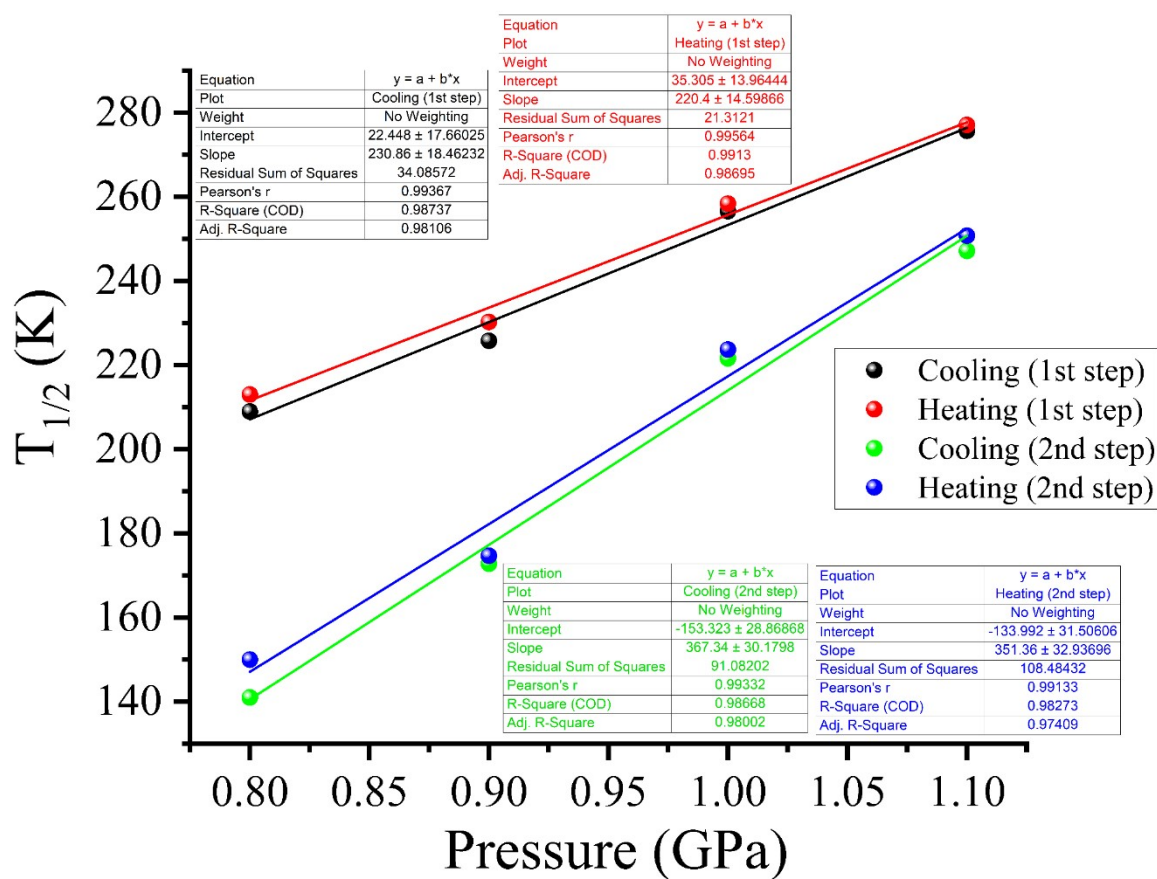

**Figure S19.**  $T_{1/2}$  vs. Pressure plots for complex 1-2H<sub>2</sub>O showing linear relation above 0.8 GPa of threshold pressure, following Clayperon law.

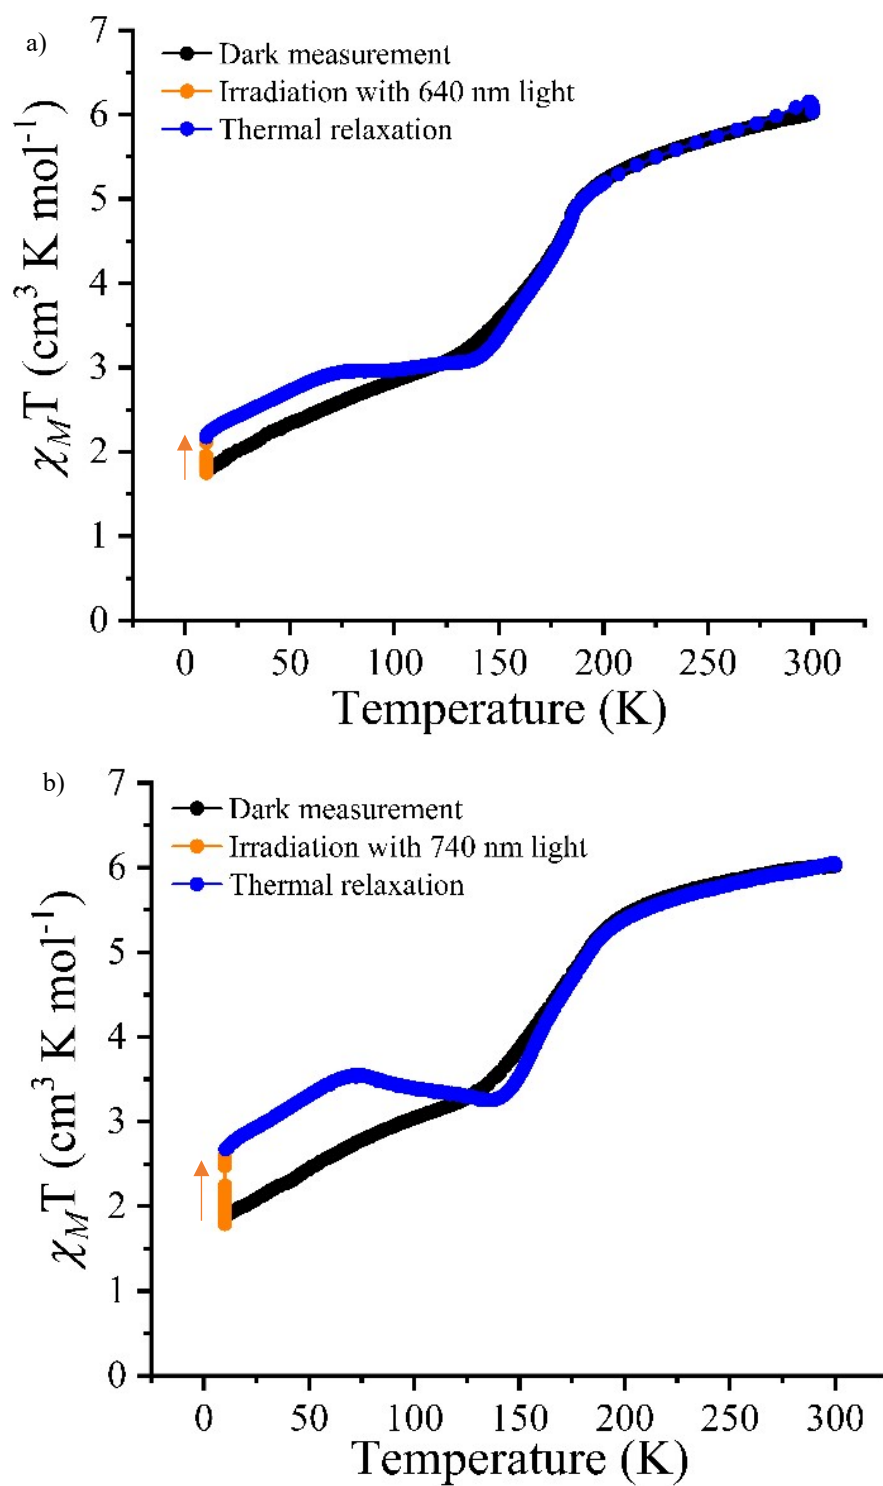

**Figure S20.**  $\chi_M T$  vs. Temperature plots for complex  $1 \cdot 2H_2O$  with irradiation with a) 640 nm and b) 740 nm of light (orange). The cooling rate is 5 K min<sup>-1</sup> (black) and after irradiation, the heating is at 2 K min<sup>-1</sup> (blue).
