# Supplementary material for: Spin state modulation and kinetic control of thermal contraction in a [Fe2Co2] discrete Prussian blue analogue
Source: Royal Society of Chemistry journal article supplement (doi:10.1039/d4sc05792a), 2024-11-13
Supplement: d4sc05792a2.pdf [file d4sc05792a2.pdf]

# Spin State Modulation and Kinetic Control of Thermal Contraction in a [Fe<sub>2</sub>Co<sub>2</sub>] Discrete Prussian Blue Analogue

Jyoti Yadav<sup>[a]</sup> and Sanjit Konar<sup>\*[a]</sup>

[a] Jyoti Yadav and Sanjit Konar\*  
Department of Chemistry, Elements Building  
Indian Institute of Science Education and Research Bhopal  
Bhauri, Bhopal By-pass road, Madhya Pradesh, India- 462066  
E-mail: [jyoti17@iiserb.ac.in](mailto:jyoti17@iiserb.ac.in), [skonar@iiserb.ac.in](mailto:skonar@iiserb.ac.in)

## Table of Contents

|     |                                                                 |       |
|-----|-----------------------------------------------------------------|-------|
| [1] | Experimental Procedures                                         | 2-3   |
|     | 1. Materials                                                    | 2     |
|     | 2. Synthetic procedures                                         | 2     |
|     | 3. Physical measurements                                        | 3     |
| [2] | Results and Discussion                                          | 4-21  |
|     | 1. Crystal structure determination of 1·4MeOH·2H <sub>2</sub> O | 4-6   |
|     | 2. Crystal structure determination of 1·2H <sub>2</sub> O       | 7-11  |
|     | 3. Crystal structure determination of 1                         | 12-13 |
|     | 4. Structure overlay                                            | 14    |
|     | 5. Thermogravimetric Analysis                                   | 15-16 |
|     | 6. FT-Infrared Spectroscopy                                     | 17-18 |
|     | 7. Magnetic study                                               | 19-23 |
| [3] | References                                                      | 23    |

## Experimental Procedures

### 1.1. Materials:

Cobalt (II) perchlorate hexahydrate and Ferric chloride were purchased from Merck and used as received. All other chemicals Potassium tris(1-Pyrazolyl) borohydride, 2-Cyanopyridine, Aniline, and Sodium Methoxide were bought from Sigma- Aldrich. Sodium Cyanide is from Loba Chemie. All the reactions were performed under ambient atmospheric conditions.

**Caution!** Cyanides are highly toxic, therefore, they should be handled with great care and precautions. The unreacted cyanides and the glassware used for the cyanide reaction were quenched by an aqueous solution of  $\text{KMnO}_4$ . Since perchlorates are highly explosive, heating was done carefully, if required.

### 1.2. Synthetic procedures:

#### 1.2.1. Synthesis of $\text{Na}[\text{Fe}(\text{Tp})(\text{CN})_3]$ :

The Fe-CN complex was prepared according to the earlier procedure reported.<sup>1</sup> Instead of KCN, NaCN was used. IR:  $\nu_{\text{CN}} = 2126 \text{ cm}^{-1}$

#### 1.2.2. Synthesis of ligand ((F5-Bn)Py), (L):

A suspension of 20 ml MeOH and 250 mg of NaOMe was taken in a 50 ml round bottom flask and stirred for 10 minutes. 2-Cyanopyridine (5 mmol) was added to the suspension and heated for 30 minutes. 2, 3, 4, 5, 6-pentafluoroaniline (5 mmol) was added to the reaction mixture and refluxed overnight. The solution was evaporated to dryness and washed with diethyl ether. After evaporation, the diethyl ether part gives a colourless crystal of the ligand (L). IR:  $\nu_{\text{NH}} = 3405, 3316, 3272 \text{ cm}^{-1}$ ,  $\nu_{\text{CH}} = 3210, 3179 \text{ cm}^{-1}$ ,  $\nu_{\text{C=C}} = 1592, 1568 \text{ cm}^{-1}$ ,  $\nu_{\text{C=N}} = 1655, 1643 \text{ cm}^{-1}$ ,  $\nu_{\text{C-F}} = 1498 \text{ cm}^{-1}$ .

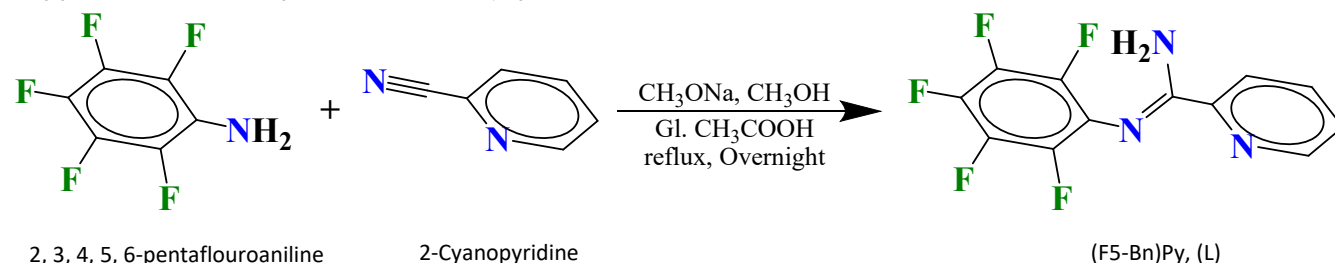

**Scheme S1.** Synthesis of ligand ((F5-Bn)Py), (L).

#### 1.2.3. Synthesis of $[\text{Fe}(\text{Tp})(\text{CN})_3]_2[\text{Co}\{\text{L}\}]_2(\text{ClO}_4)_2 \cdot 4\text{MeOH} \cdot 2\text{H}_2\text{O}$ (1·4MeOH·2H<sub>2</sub>O):

Methanolic solution of ligand and  $\text{Co}(\text{ClO}_4)_2 \cdot 6\text{H}_2\text{O}$  was added to a 2: 1 MeOH:  $\text{H}_2\text{O}$  solution of  $\text{Na}[\text{FeTp}(\text{CN})_3]$  and heated at 40 °C for 30 minutes. The solution was filtered hot and kept for crystallisation. Red plate-like crystals of complex 1·4MeOH·2H<sub>2</sub>O were obtained after one week of slow evaporation.

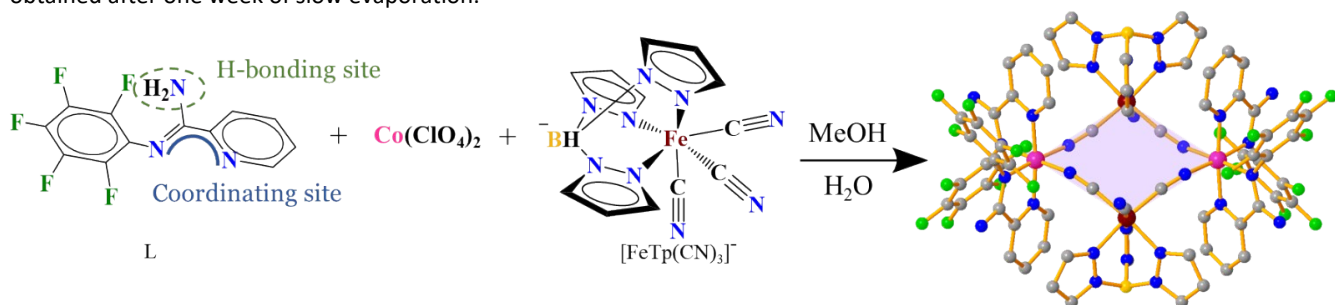

**Scheme S2.** Synthesis of  $[\text{Fe}(\text{Tp})(\text{CN})_3]_2[\text{Co}\{\text{L}\}]_2(\text{ClO}_4)_2 \cdot 4\text{MeOH} \cdot 2\text{H}_2\text{O}$  (1·4MeOH·2H<sub>2</sub>O).

**Elemental Analysis:** 1·4MeOH·2H<sub>2</sub>O: Experimental: N = 18.48%, C = 40.17% and H = 2.92%; Calculated: C = 39.39%, H = 2.52% and N = 18.13%.

#### 1.2.4. Partially desolvated complex (1·2H<sub>2</sub>O):

The complex was obtained by the eventual escape of methanol molecules when kept at room temperature (25° C). The bulk sample was prepared by keeping the crystals under vacuum for 2-3 hours at room temperature. Selective loss of methanol molecules was observed.

**Elemental Analysis:** 1·2H<sub>2</sub>O: Experimental: C = 39.79%, H = 2.36%, N = 19.63%; Calculated: C = 39.39%, H = 2.20%, N = 19.14%.

### 1.2.5. Desolvated Complex (1):

The desolvation process was done by keeping freshly prepared samples at 50°C under a high vacuum for ~1 hour. The complete loss of solvents was characterised by elemental analysis and infrared spectroscopy.

**Elemental Analysis: 1:** Experimental: C = 40.38%, H = 2.32%, N = 19.32%; Calculated: C = 40.05%, H = 2.05%, N = 19.46%.

## 1.3. Physical measurements:

### 1.3.1. Crystal Data Collection and Structure Determination:

Intensity data were collected on a 'Bruker D8-Quest' diffractometer using a graphite monochromated MoK $\alpha$  radiation ( $\lambda = 0.71073$ ) at 140 K. Data collections were performed using  $\phi$  and  $\omega$  scan. Olex2 was used as the graphical interface and the structures were solved with olex2.solve structure solution program using Charge Flipping and refined with the ShelXL refinement package using Least-Squares minimisation. All non-hydrogen atoms were refined anisotropically.<sup>2</sup> Shape analysis was done by continuous shape measurement (CShM) program and octahedral distortion parameters were calculated by using the software "Octadist".<sup>3</sup>

### 1.3.2. Squid Magnetometry Study:

The magnetic study has been performed using a SQUID-VSM magnetometer. All samples were ground properly before measuring magnetic moment vs. temperature data, to minimize the reorientation of the crystalline particles under the applied DC field. All the measurements have been performed with an applied DC field of 10000 Oe and 1000 Oe from the 2 K to 300 K temperature range. The measured values were corrected for the experimentally measured contribution of the sample holder and the derived susceptibilities were corrected for the diamagnetism of the samples, estimated from Pascal's tables.

The photomagnetic study was performed using a SQUID magnetometer integrated with a fibre optic sample holder (FOSH). A thin layer of 3.3 mg sample was spread evenly on a transparent tape and inserted into the optic fibre holder. The sample was irradiated with light of different wavelengths ranging from 436 nm to 850 nm at 10 K and showed maximum conversion with 525 nm of light. The sample was irradiated for 1 hour at each of the wavelengths to check for the generation of the metastable state. For the wavelengths accelerating the conversion of the diamagnetic sample to the metastable state, the irradiation was done up to saturation to the excited state, which was approximately 4-5 hours. The photo-irradiation was followed by the thermal treatment of the sample in dark conditions and observed for the temperature of relaxation to its diamagnetic state.

The operating pressure range of the hydrostatic pressure cell, which is composed of hardened beryllium bronze and uses low-viscosity Daphne oil as the pressure-transferring medium, is  $10^5$  Pa to 1.3 GPa. The sample holders for the powder were cylindrical, measuring 1.1 mm in diameter and 5 mm in length. The built-in pressure sensor composed of highly pure Pb was used to measure the pressure utilizing the pressure dependence of the superconducting transition temperature. The mentioned applied pressures are the approximate calculated values concerning the compression of the Teflon tube consisting of sample, Pb and the pressure-transferring medium.

### 1.3.3. Thermogravimetric Analysis:

The Thermogravimetric analysis was performed on a PerkinElmer instrument at a scan rate of 3 K/min.

### 1.3.4. FT-Infrared Spectroscopy:

FT-IR spectra were recorded by using a Perkin-Elmer Spectrum BX Spectrometer with a wavenumber ranging between 4000  $\text{cm}^{-1}$  - 400  $\text{cm}^{-1}$ .

## Results and Discussion

### 2.1. Crystal structure determination of 1·4MeOH·2H<sub>2</sub>O:

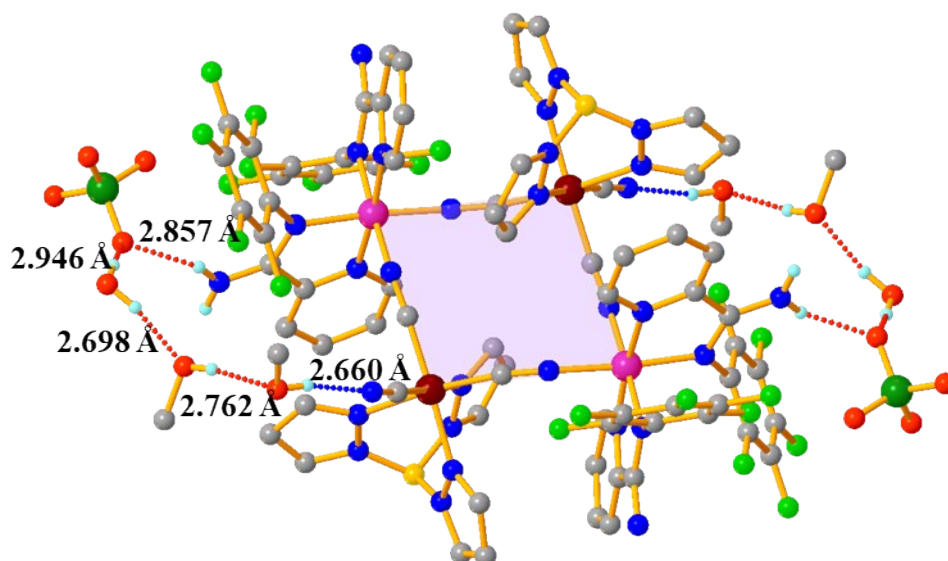

**Figure S1.** Crystal Structure of 1·4MeOH·2H<sub>2</sub>O. Colour Code: Green: Fe; Pink: Co; Blue: N; Grey: C; Yellow: B; Dark green: Cl; Light green: F. H-bonding interactions between the square complex, solvents and anions are shown with red dotted lines. The hydrogen not involved in H-bonding is omitted for clarity.

**Table S1.** Crystallographic data of 1·4MeOH·2H<sub>2</sub>O:

| Identification code                                                                                                                                                                                                              | 1·4MeOH·2H <sub>2</sub> O                                                             |                                                                                       |                                                                                       |                                                                                       |
|----------------------------------------------------------------------------------------------------------------------------------------------------------------------------------------------------------------------------------|---------------------------------------------------------------------------------------|---------------------------------------------------------------------------------------|---------------------------------------------------------------------------------------|---------------------------------------------------------------------------------------|
| Temperature (K)                                                                                                                                                                                                                  | 100                                                                                   | 168                                                                                   | 200                                                                                   | 250                                                                                   |
| Empirical formula                                                                                                                                                                                                                | C <sub>38</sub> H <sub>29</sub> BClCoF <sub>10</sub> FeN <sub>15</sub> O <sub>7</sub> | C <sub>38</sub> H <sub>29</sub> BClCoF <sub>10</sub> FeN <sub>15</sub> O <sub>7</sub> | C <sub>38</sub> H <sub>29</sub> BClCoF <sub>10</sub> FeN <sub>15</sub> O <sub>7</sub> | C <sub>38</sub> H <sub>32</sub> BClCoF <sub>10</sub> FeN <sub>15</sub> O <sub>7</sub> |
| Formula weight                                                                                                                                                                                                                   | 1158.80                                                                               | 1158.80                                                                               | 1158.80                                                                               | 1161.82                                                                               |
| Temperature/K                                                                                                                                                                                                                    | 100.0                                                                                 | 168.0                                                                                 | 200.0                                                                                 | 250.0                                                                                 |
| Crystal system                                                                                                                                                                                                                   | monoclinic                                                                            | monoclinic                                                                            | monoclinic                                                                            | monoclinic                                                                            |
| Space group                                                                                                                                                                                                                      | P2 <sub>1</sub> /c                                                                    | P2 <sub>1</sub> /c                                                                    | P2 <sub>1</sub> /c                                                                    | P2 <sub>1</sub> /c                                                                    |
| a/Å                                                                                                                                                                                                                              | 14.735(5)                                                                             | 14.852(5)                                                                             | 14.867(4)                                                                             | 14.938(11)                                                                            |
| b/Å                                                                                                                                                                                                                              | 20.586(7)                                                                             | 20.700(8)                                                                             | 20.702(6)                                                                             | 20.830(16)                                                                            |
| c/Å                                                                                                                                                                                                                              | 15.382(6)                                                                             | 15.425(6)                                                                             | 15.437(4)                                                                             | 15.450(12)                                                                            |
| α/°                                                                                                                                                                                                                              | 90                                                                                    | 90                                                                                    | 90                                                                                    | 90                                                                                    |
| β/°                                                                                                                                                                                                                              | 103.396(10)                                                                           | 103.695(11)                                                                           | 103.782(7)                                                                            | 103.72(2)                                                                             |
| γ/°                                                                                                                                                                                                                              | 90                                                                                    | 90                                                                                    | 90                                                                                    | 90                                                                                    |
| Volume/Å <sup>3</sup>                                                                                                                                                                                                            | 4539(3)                                                                               | 4608(3)                                                                               | 4614(2)                                                                               | 4670(6)                                                                               |
| Z                                                                                                                                                                                                                                | 4                                                                                     | 4                                                                                     | 4                                                                                     | 4                                                                                     |
| ρ <sub>calc</sub> /g/cm <sup>3</sup>                                                                                                                                                                                             | 1.696                                                                                 | 1.670                                                                                 | 1.668                                                                                 | 1.652                                                                                 |
| R <sub>1</sub> <sup>a</sup>                                                                                                                                                                                                      | 0.0426                                                                                | 0.0439                                                                                | 0.0432                                                                                | 0.0722                                                                                |
| wR <sub>2</sub> <sup>a</sup>                                                                                                                                                                                                     | 0.1049                                                                                | 0.1078                                                                                | 0.1103                                                                                | 0.2135                                                                                |
| [a] I ≥ 2σ(I): R <sub>1</sub> = Σ   F <sub>o</sub>   -  F <sub>c</sub>    / Σ  F <sub>o</sub>  , wR <sub>2</sub> = {Σ [w(F <sub>o</sub> - F <sub>c</sub> ) <sup>2</sup> ] / Σ [w(F <sub>o</sub> ) <sup>2</sup> ]} <sup>1/2</sup> |                                                                                       |                                                                                       |                                                                                       |                                                                                       |

**Table S2.** Selected bond lengths of 1·4MeOH·2H<sub>2</sub>O:

| Atom | Atom            | Length/Å |          |          |           |
|------|-----------------|----------|----------|----------|-----------|
|      |                 | 100 K    | 168 K    | 200 K    | 250 K     |
| Co1  | N15             | 1.921(3) | 1.925(3) | 1.922(3) | 1.946(7)  |
| Co1  | N10             | 1.914(3) | 1.920(3) | 1.920(3) | 1.942(6)  |
| Co1  | N12             | 1.933(3) | 1.939(3) | 1.939(3) | 1.933(6)  |
| Co1  | N13             | 1.940(3) | 1.942(3) | 1.942(3) | 1.946(7)  |
| Co1  | N9              | 1.890(3) | 1.894(3) | 1.894(3) | 1.899(7)  |
| Co1  | N2 <sup>1</sup> | 1.909(3) | 1.916(3) | 1.911(3) | 1.906(7)  |
| Fe1  | N3              | 1.999(3) | 2.005(3) | 2.002(3) | 2.005(7)  |
| Fe1  | N6              | 1.996(3) | 1.998(3) | 1.996(3) | 2.017(8)  |
| Fe1  | N8              | 2.007(3) | 2.014(3) | 2.010(3) | 2.000(7)  |
| Fe1  | C12             | 1.857(4) | 1.866(4) | 1.863(4) | 1.878(9)  |
| Fe1  | C1              | 1.889(4) | 1.896(4) | 1.901(4) | 1.883(9)  |
| Fe1  | C2              | 1.866(4) | 1.871(4) | 1.869(4) | 1.900(11) |

**Table S3.** Selected bond angles of 1·4MeOH·2H<sub>2</sub>O forming [Fe<sub>2</sub>Co<sub>2</sub>] square plane:

| Atom | Atom | Atom            | Angles/°  |           |           |         |
|------|------|-----------------|-----------|-----------|-----------|---------|
|      |      |                 | 100 K     | 168 K     | 200 K     | 250 K   |
| N9   | Co1  | N2 <sup>1</sup> | 87.52(12) | 87.65(12) | 87.51(12) | 87.5(3) |
| C12  | Fe1  | C2              | 97.36(15) | 97.22(15) | 97.47(14) | 98.1(3) |

**Table S4.** Octahedral Shape Analysis of 1·4MeOH·2H<sub>2</sub>O:

| Octahedral Shape Analysis Value |       |       |       |       |
|---------------------------------|-------|-------|-------|-------|
| Metal centre                    | 100K  | 168K  | 200K  | 250 K |
| Co                              | 0.393 | 0.392 | 0.401 | 0.356 |
| Fe                              | 0.187 | 0.180 | 0.182 | 0.186 |

**Table S5.** Octahedral distortion parameters for 1·4MeOH·2H<sub>2</sub>O:

| Temperature | Metal centre | <D> (Å) | Z (Å)    | Δ        | Σ (°)   | Θ (°)    |
|-------------|--------------|---------|----------|----------|---------|----------|
| 250 K       | Co           | 1.9286  | 0.105140 | 0.000099 | 41.9033 | 131.3609 |
|             | Fe           | 1.9471  | 0.361916 | 0.000978 | 38.3556 | 85.1762  |
| 100 K       | Co           | 1.9178  | 0.080549 | 0.000072 | 45.2858 | 138.5380 |
|             | Fe           | 1.9358  | 0.389730 | 0.001153 | 36.2276 | 85.7889  |

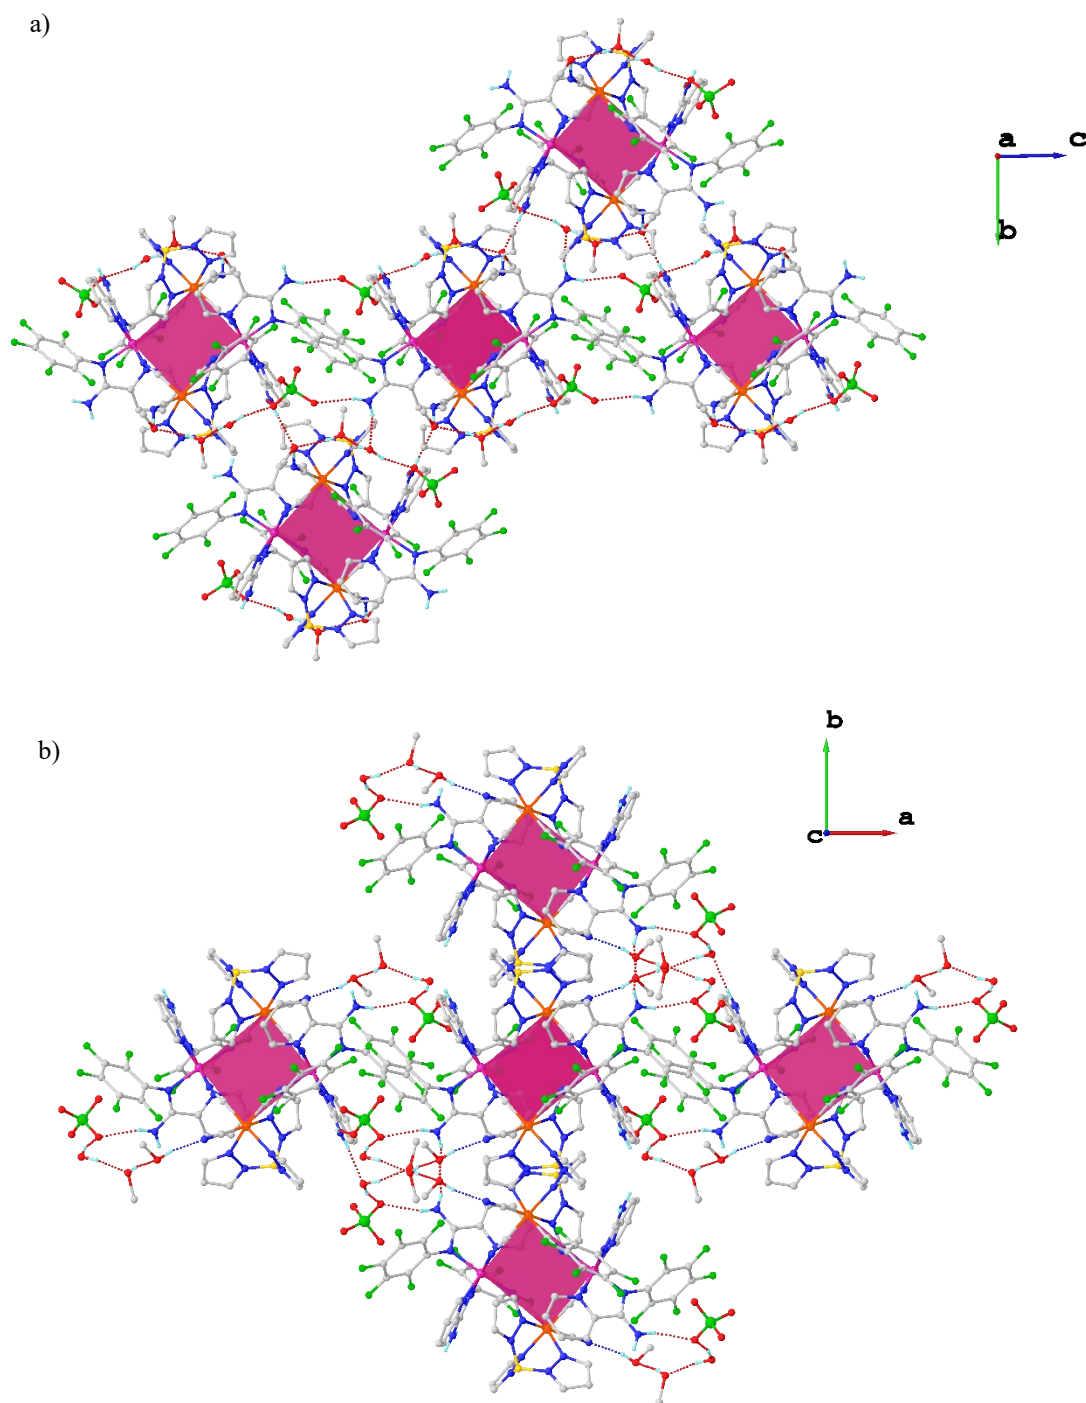

**Figure S2.** Hydrogen bonding interactions between solvent molecules, perchlorate anions and the  $[\text{Fe}_2(\mu\text{-CN})\text{Co}_2]$  square grids a) along the *bc* plane and b) along the *ab* plane in complex  $1 \cdot 4\text{MeOH} \cdot 2\text{H}_2\text{O}$ . The Hydrogen atoms not involved in Hydrogen bonding have been omitted for clarity.

## 2.2. Crystal structure determination of 1·2H<sub>2</sub>O:

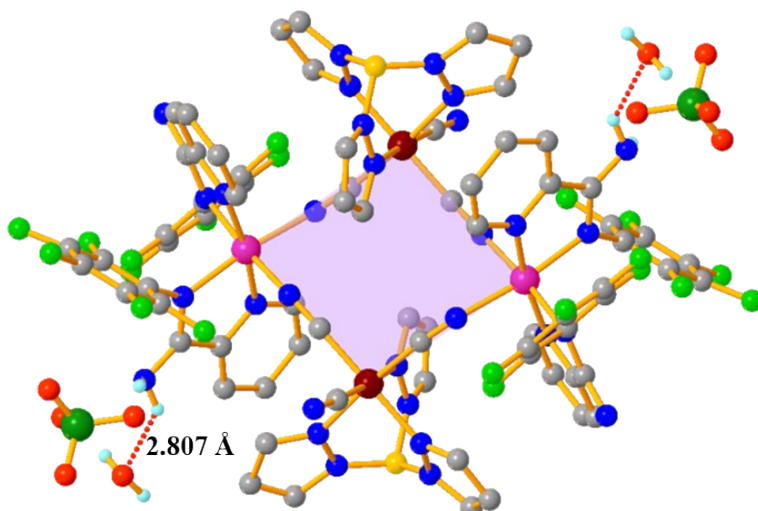

**Figure S3.** Crystal Structure of 1·2H<sub>2</sub>O. Colour Code: Green: Fe; Pink: Co; Blue: N; Grey: C; Yellow: B, Dark green: Cl, Light green: F. H-bonding interactions between the square complex, solvents and anions are shown with red dotted lines. The hydrogen not involved in H-bonding is omitted for clarity.

**Table S6.** Crystallographic data of 1·2H<sub>2</sub>O during cooling @5 K min<sup>-1</sup>:

| Identification code                                                                                                                                                                                                            | 1_2H <sub>2</sub> O_200K_1C                                                           | 1_2H <sub>2</sub> O_168K_1C                                                           | 1_2H <sub>2</sub> O_140K_1C                                                           | 1_2H <sub>2</sub> O_110K_1                                                            |
|--------------------------------------------------------------------------------------------------------------------------------------------------------------------------------------------------------------------------------|---------------------------------------------------------------------------------------|---------------------------------------------------------------------------------------|---------------------------------------------------------------------------------------|---------------------------------------------------------------------------------------|
| Temperature (K)                                                                                                                                                                                                                | 200                                                                                   | 168                                                                                   | 140                                                                                   | 110                                                                                   |
| Empirical formula                                                                                                                                                                                                              | C <sub>36</sub> H <sub>24</sub> BClCoF <sub>10</sub> FeN <sub>15</sub> O <sub>5</sub> | C <sub>36</sub> H <sub>24</sub> BClCoF <sub>10</sub> FeN <sub>15</sub> O <sub>5</sub> | C <sub>36</sub> H <sub>24</sub> BClCoF <sub>10</sub> FeN <sub>15</sub> O <sub>5</sub> | C <sub>36</sub> H <sub>24</sub> BClCoF <sub>10</sub> FeN <sub>15</sub> O <sub>5</sub> |
| Formula weight                                                                                                                                                                                                                 | 1097.74                                                                               | 1097.74                                                                               | 1097.74                                                                               | 1097.74                                                                               |
| Temperature/K                                                                                                                                                                                                                  | 100.0                                                                                 | 168.0                                                                                 | 140.0                                                                                 | 110.0                                                                                 |
| Crystal system                                                                                                                                                                                                                 | Monoclinic                                                                            | Monoclinic                                                                            | Monoclinic                                                                            | Monoclinic                                                                            |
| Space group                                                                                                                                                                                                                    | P2 <sub>1</sub> /c                                                                    | P2 <sub>1</sub> /c                                                                    | P2 <sub>1</sub> /c                                                                    | P2 <sub>1</sub> /c                                                                    |
| a/Å                                                                                                                                                                                                                            | 14.5189(6)                                                                            | 14.5597(12)                                                                           | 14.5844(15)                                                                           | 14.5659(13)                                                                           |
| b/Å                                                                                                                                                                                                                            | 22.4945(8)                                                                            | 22.1504(16)                                                                           | 21.947(2)                                                                             | 21.8912(18)                                                                           |
| c/Å                                                                                                                                                                                                                            | 14.6481(6)                                                                            | 14.5863(12)                                                                           | 14.5400(15)                                                                           | 14.5075(14)                                                                           |
| α/°                                                                                                                                                                                                                            | 90                                                                                    | 90                                                                                    | 90                                                                                    | 90                                                                                    |
| β/°                                                                                                                                                                                                                            | 107.3870(10)                                                                          | 107.475(3)                                                                            | 107.574(3)                                                                            | 107.593(3)                                                                            |
| γ/°                                                                                                                                                                                                                            | 90                                                                                    | 90                                                                                    | 90                                                                                    | 90                                                                                    |
| Volume/Å <sup>3</sup>                                                                                                                                                                                                          | 4565.4(3)                                                                             | 4487.0(6)                                                                             | 4436.8(8)                                                                             | 4409.6(7)                                                                             |
| Z                                                                                                                                                                                                                              | 4                                                                                     | 4                                                                                     | 4                                                                                     | 4                                                                                     |
| ρ <sub>calc</sub> /cm <sup>3</sup>                                                                                                                                                                                             | 1.597                                                                                 | 1.625                                                                                 | 1.643                                                                                 | 1.654                                                                                 |
| R <sub>1</sub> <sup>a</sup>                                                                                                                                                                                                    | 0.0841                                                                                | 0.0592                                                                                | 0.0573                                                                                | 0.0580                                                                                |
| wR <sub>2</sub> <sup>a</sup>                                                                                                                                                                                                   | 0.1887                                                                                | 0.1609                                                                                | 0.1555                                                                                | 0.1527                                                                                |
| [a] I ≥ 2σ(I): R <sub>1</sub> = Σ   F <sub>o</sub>   -  F <sub>c</sub>    / Σ  F <sub>o</sub>  , wR <sub>2</sub> = {Σ[w(F <sub>o</sub> - F <sub>c</sub> ) <sup>2</sup> ] / Σ[w(F <sub>o</sub> ) <sup>2</sup> ]} <sup>1/2</sup> |                                                                                       |                                                                                       |                                                                                       |                                                                                       |

**Table S7.** Crystallographic data of  $1 \cdot 2\text{H}_2\text{O}$  during heating @5 K min<sup>-1</sup>:

| Identification code                                                                                                                                                                                                                   | 1_2H <sub>2</sub> O_140K_1H                                                           | 1_2H <sub>2</sub> O_168K_1H                                                           | 1_2H <sub>2</sub> O_200K_1H                                                           |
|---------------------------------------------------------------------------------------------------------------------------------------------------------------------------------------------------------------------------------------|---------------------------------------------------------------------------------------|---------------------------------------------------------------------------------------|---------------------------------------------------------------------------------------|
| Temperature (K)                                                                                                                                                                                                                       | 140                                                                                   | 168                                                                                   | 200                                                                                   |
| Empirical formula                                                                                                                                                                                                                     | C <sub>36</sub> H <sub>24</sub> BClCoF <sub>10</sub> FeN <sub>15</sub> O <sub>5</sub> | C <sub>36</sub> H <sub>24</sub> BClCoF <sub>10</sub> FeN <sub>15</sub> O <sub>5</sub> | C <sub>36</sub> H <sub>24</sub> BClCoF <sub>10</sub> FeN <sub>15</sub> O <sub>5</sub> |
| Formula weight                                                                                                                                                                                                                        | 1097.74                                                                               | 1097.74                                                                               | 1097.74                                                                               |
| Temperature/K                                                                                                                                                                                                                         | 140.0                                                                                 | 168.0                                                                                 | 200.0                                                                                 |
| Crystal system                                                                                                                                                                                                                        | Monoclinic                                                                            | Monoclinic                                                                            | Monoclinic                                                                            |
| Space group                                                                                                                                                                                                                           | P2 <sub>1</sub> /c                                                                    | P2 <sub>1</sub> /c                                                                    | P2 <sub>1</sub> /c                                                                    |
| a/Å                                                                                                                                                                                                                                   | 14.586(3)                                                                             | 14.555(3)                                                                             | 14.5088(10)                                                                           |
| b/Å                                                                                                                                                                                                                                   | 21.940(4)                                                                             | 22.133(4)                                                                             | 22.4672(13)                                                                           |
| c/Å                                                                                                                                                                                                                                   | 14.537(3)                                                                             | 14.590(3)                                                                             | 14.6367(10)                                                                           |
| α/°                                                                                                                                                                                                                                   | 90                                                                                    | 90                                                                                    | 90                                                                                    |
| β/°                                                                                                                                                                                                                                   | 107.634(5)                                                                            | 107.506(6)                                                                            | 107.396(2)                                                                            |
| γ/°                                                                                                                                                                                                                                   | 90                                                                                    | 90                                                                                    | 90                                                                                    |
| Volume/Å <sup>3</sup>                                                                                                                                                                                                                 | 4433.7(14)                                                                            | 4482.4(17)                                                                            | 4552.9(5)                                                                             |
| Z                                                                                                                                                                                                                                     | 4                                                                                     | 4                                                                                     | 4                                                                                     |
| ρ <sub>calc</sub> /g/cm <sup>3</sup>                                                                                                                                                                                                  | 1.645                                                                                 | 1.627                                                                                 | 1.601                                                                                 |
| R <sub>1</sub> <sup>a</sup>                                                                                                                                                                                                           | 0.0590                                                                                | 0.0583                                                                                | 0.0816                                                                                |
| wR <sub>2</sub> <sup>a</sup>                                                                                                                                                                                                          | 0.1547                                                                                | 0.1594                                                                                | 0.1888                                                                                |
| [a]   ≥ 2σ(I): R <sub>1</sub> = Σ    F <sub>o</sub>   -   F <sub>c</sub>      / Σ   F <sub>o</sub>  , wR <sub>2</sub> = {Σ [w(F <sub>o</sub> - F <sub>c</sub> ) <sup>2</sup> ] / Σ [w(F <sub>o</sub> ) <sup>2</sup> ]} <sup>1/2</sup> |                                                                                       |                                                                                       |                                                                                       |

**Table S8.** Selected bond lengths of 1·2H<sub>2</sub>O during cooling and heating mode @5 K min<sup>-1</sup>:

| Atom | Atom            | Bond length/Å |          |          |          |          |          |          |
|------|-----------------|---------------|----------|----------|----------|----------|----------|----------|
|      |                 | 200           | 168      | 140      | 110      | 140      | 168      | 200      |
| Co1  | N13             | 2.110(6)      | 2.061(4) | 2.008(4) | 2.005(4) | 2.014(4) | 2.062(4) | 2.124(6) |
| Co1  | N12             | 2.113(6)      | 2.047(4) | 2.012(4) | 2.002(4) | 2.012(4) | 2.048(4) | 2.108(5) |
| Co1  | N15             | 2.109(5)      | 2.052(4) | 1.997(4) | 1.998(4) | 2.001(4) | 2.047(4) | 2.112(6) |
| Co1  | N2 <sup>1</sup> | 2.107(6)      | 2.032(4) | 1.989(4) | 1.983(4) | 1.989(4) | 2.031(4) | 2.099(6) |
| Co1  | N9              | 2.107(6)      | 2.028(4) | 1.976(4) | 1.974(4) | 1.981(4) | 2.024(4) | 2.106(6) |
| Co1  | N10             | 2.129(6)      | 2.041(4) | 2.024(4) | 2.015(4) | 2.025(4) | 2.039(4) | 2.110(6) |
| Fe1  | N3              | 1.975(6)      | 1.981(4) | 1.988(4) | 1.990(4) | 1.987(4) | 1.979(4) | 1.969(6) |
| Fe1  | N8              | 1.968(6)      | 1.991(4) | 1.984(4) | 1.986(4) | 1.983(4) | 1.987(4) | 1.967(6) |
| Fe1  | N6              | 1.975(6)      | 1.980(4) | 1.994(4) | 1.996(4) | 2.001(4) | 1.978(4) | 1.970(6) |
| Fe1  | C12             | 1.913(8)      | 1.896(5) | 1.893(5) | 1.885(5) | 1.881(5) | 1.900(5) | 1.895(7) |
| Fe1  | C2              | 1.894(7)      | 1.885(5) | 1.880(5) | 1.871(5) | 1.869(5) | 1.885(5) | 1.925(8) |
| Fe1  | C1              | 1.924(8)      | 1.918(5) | 1.922(5) | 1.917(5) | 1.913(5) | 1.918(5) | 1.923(7) |

**Table S9.** Selected bond angles of 1·2H<sub>2</sub>O during cooling and heating mode @5 K min<sup>-1</sup>:

| Atoms |     |                 | Angles/° |           |           |           |           |           |         |
|-------|-----|-----------------|----------|-----------|-----------|-----------|-----------|-----------|---------|
|       |     |                 | 200 K    | 168 K     | 140 K     | 110 K     | 140 K     | 168 K     | 200 K   |
| N9    | Co1 | N2 <sup>1</sup> | 84.9(2)  | 85.10(15) | 85.53(15) | 85.85(15) | 85.71(15) | 85.31(15) | 84.7(2) |
| C12   | Fe1 | C2              | 90.6(3)  | 93.24(19) | 94.70(19) | 94.70(19) | 94.64(19) | 93.28(19) | 90.8(3) |

**Table S10.** Octahedral Shape Analysis of 1·2H<sub>2</sub>O during cooling and heating mode @5 K min<sup>-1</sup>:

| Octahedral Shape Analysis Value |       |       |       |       |       |       |       |
|---------------------------------|-------|-------|-------|-------|-------|-------|-------|
| Metal centre                    | 200 K | 168 K | 140 K | 110 K | 140 K | 168 K | 200 K |
| Co                              | 1.130 | 0.883 | 0.723 | 0.723 | 0.706 | 0.869 | 1.150 |
| Fe                              | 0.109 | 0.147 | 0.167 | 0.167 | 0.166 | 0.135 | 0.105 |

**Table S11.** Octahedral distortion parameters for 1·2H<sub>2</sub>O during cooling and heating mode @5 K min<sup>-1</sup>:

| Temperature (K) | Metal centre | <D> (Å) | Z (Å)    | Δ        | Σ (°)   | Θ (°)    |
|-----------------|--------------|---------|----------|----------|---------|----------|
| 200             | Co           | 2.1125  | 0.034745 | 0.000013 | 71.3885 | 216.0295 |
|                 | Fe           | 1.9415  | 0.186854 | 0.000278 | 21.0018 | 64.1777  |
| 168             | Co           | 2.0435  | 0.058561 | 0.000030 | 62.7426 | 197.4726 |
|                 | Fe           | 1.9420  | 0.252804 | 0.000499 | 24.7315 | 77.3182  |
| 140             | Co           | 2.0012  | 0.081449 | 0.000061 | 56.5163 | 181.0988 |
|                 | Fe           | 1.9433  | 0.271347 | 0.000586 | 26.9007 | 83.3626  |
| 110             | Co           | 1.9965  | 0.070066 | 0.000047 | 54.6728 | 175.5133 |
|                 | Fe           | 1.9407  | 0.298537 | 0.000708 | 26.0526 | 82.7088  |
| 140             | Co           | 2.0037  | 0.079822 | 0.000057 | 55.7630 | 178.6307 |
|                 | Fe           | 1.9389  | 0.309204 | 0.000761 | 26.1240 | 82.5078  |
| 168             | Co           | 2.0417  | 0.063576 | 0.000037 | 61.9579 | 195.7921 |
|                 | Fe           | 1.9413  | 0.240597 | 0.000453 | 24.2697 | 74.3951  |
| 200             | Co           | 2.1099  | 0.032355 | 0.000012 | 71.8219 | 218.3610 |
|                 | Fe           | 1.9417  | 0.163342 | 0.000221 | 21.3293 | 64.4477  |

**Table S12.** Crystallographic data of 1·2H<sub>2</sub>O during heating @1 K min<sup>-1</sup>:

| Identification code                                                                                                                                                                                                                                                   | 1_2H <sub>2</sub> O_120K_2H                                                           | 1_2H <sub>2</sub> O_140K_2H                                                           | 1_2H <sub>2</sub> O_168K_2H                                                           | 1_2H <sub>2</sub> O_200K_2H                                                           |
|-----------------------------------------------------------------------------------------------------------------------------------------------------------------------------------------------------------------------------------------------------------------------|---------------------------------------------------------------------------------------|---------------------------------------------------------------------------------------|---------------------------------------------------------------------------------------|---------------------------------------------------------------------------------------|
| Temperature (K)                                                                                                                                                                                                                                                       | 120                                                                                   | 140                                                                                   | 168                                                                                   | 200                                                                                   |
| Empirical formula                                                                                                                                                                                                                                                     | C <sub>36</sub> H <sub>24</sub> BClCoF <sub>10</sub> FeN <sub>15</sub> O <sub>5</sub> | C <sub>36</sub> H <sub>24</sub> BClCoF <sub>10</sub> FeN <sub>15</sub> O <sub>5</sub> | C <sub>36</sub> H <sub>24</sub> BClCoF <sub>10</sub> FeN <sub>15</sub> O <sub>5</sub> | C <sub>36</sub> H <sub>24</sub> BClCoF <sub>10</sub> FeN <sub>15</sub> O <sub>5</sub> |
| Formula weight                                                                                                                                                                                                                                                        | 1097.74                                                                               | 1097.74                                                                               | 1097.74                                                                               | 1097.74                                                                               |
| Temperature/K                                                                                                                                                                                                                                                         | 120.0                                                                                 | 140.0                                                                                 | 168.0                                                                                 | 200.0                                                                                 |
| Crystal system                                                                                                                                                                                                                                                        | monoclinic                                                                            | monoclinic                                                                            | monoclinic                                                                            | monoclinic                                                                            |
| Space group                                                                                                                                                                                                                                                           | P2 <sub>1</sub> /c                                                                    | P2 <sub>1</sub> /c                                                                    | P2 <sub>1</sub> /c                                                                    | P2 <sub>1</sub> /c                                                                    |
| a/Å                                                                                                                                                                                                                                                                   | 14.608(3)                                                                             | 14.6328(10)                                                                           | 14.618(3)                                                                             | 14.5568(5)                                                                            |
| b/Å                                                                                                                                                                                                                                                                   | 21.690(4)                                                                             | 21.6526(17)                                                                           | 21.998(4)                                                                             | 22.4909(8)                                                                            |
| c/Å                                                                                                                                                                                                                                                                   | 14.447(3)                                                                             | 14.4816(12)                                                                           | 14.513(3)                                                                             | 14.6069(5)                                                                            |
| α/°                                                                                                                                                                                                                                                                   | 90                                                                                    | 90                                                                                    | 90                                                                                    | 90                                                                                    |
| β/°                                                                                                                                                                                                                                                                   | 107.574(4)                                                                            | 107.596(4)                                                                            | 107.492(4)                                                                            | 107.3370(10)                                                                          |
| γ/°                                                                                                                                                                                                                                                                   | 90                                                                                    | 90                                                                                    | 90                                                                                    | 90                                                                                    |
| Volume/Å <sup>3</sup>                                                                                                                                                                                                                                                 | 4363.8(14)                                                                            | 4373.6(6)                                                                             | 4451.1(15)                                                                            | 4565.0(3)                                                                             |
| Z                                                                                                                                                                                                                                                                     | 4                                                                                     | 4                                                                                     | 4                                                                                     | 4                                                                                     |
| ρ <sub>calc</sub> /g/cm <sup>3</sup>                                                                                                                                                                                                                                  | 1.671                                                                                 | 1.667                                                                                 | 1.638                                                                                 | 1.597                                                                                 |
| R <sub>1</sub> <sup>a</sup>                                                                                                                                                                                                                                           | 0.0706                                                                                | 0.0918                                                                                | 0.0684                                                                                | 0.1264                                                                                |
| wR <sub>2</sub> <sup>a</sup>                                                                                                                                                                                                                                          | 0.1859                                                                                | 0.2086                                                                                | 0.1861                                                                                | 0.2943                                                                                |
| [a] I ≥ 2σ(I): R <sub>1</sub> = Σ   F <sub>o</sub>   -  F <sub>c</sub>    / Σ  F <sub>o</sub>  , wR <sub>2</sub> = {Σ[w(F <sub>o</sub> <sup>2</sup> - F <sub>c</sub> <sup>2</sup> ) <sup>2</sup> ] / Σ[w(F <sub>o</sub> <sup>2</sup> ) <sup>2</sup> ]} <sup>1/2</sup> |                                                                                       |                                                                                       |                                                                                       |                                                                                       |

**Table S13.** Selected bond lengths of 1·2H<sub>2</sub>O during heating mode @1 K min<sup>-1</sup>:

| Atom | Atom            | Bond length/Å |          |          |          |           |
|------|-----------------|---------------|----------|----------|----------|-----------|
|      |                 | 110 K         | 120 K    | 140 K    | 168 K    | 200 K     |
| Co1  | N13             | 2.005(4)      | 1.971(5) | 1.974(7) | 2.030(5) | 2.131(9)  |
| Co1  | N12             | 2.002(4)      | 1.966(5) | 1.952(7) | 2.030(5) | 2.103(9)  |
| Co1  | N15             | 1.998(4)      | 1.949(6) | 1.949(7) | 2.020(6) | 2.106(9)  |
| Co1  | N2 <sup>1</sup> | 1.983(4)      | 1.944(6) | 1.933(7) | 2.017(5) | 2.101(10) |
| Co1  | N9              | 1.974(4)      | 1.914(6) | 1.913(7) | 1.996(6) | 2.103(10) |
| Co1  | N10             | 2.015(4)      | 1.952(6) | 1.960(7) | 2.010(5) | 2.113(9)  |
| Fe1  | N3              | 1.990(4)      | 2.001(5) | 2.005(7) | 1.986(6) | 1.953(9)  |
| Fe1  | N8              | 1.986(4)      | 1.997(5) | 1.980(7) | 1.990(5) | 1.969(9)  |
| Fe1  | N6              | 1.996(4)      | 1.986(6) | 1.995(7) | 1.977(5) | 1.972(10) |
| Fe1  | C12             | 1.885(5)      | 1.874(7) | 1.872(9) | 1.890(7) | 1.875(11) |
| Fe1  | C2              | 1.871(5)      | 1.853(7) | 1.849(9) | 1.871(7) | 1.933(13) |
| Fe1  | C1              | 1.917(5)      | 1.914(7) | 1.908(9) | 1.917(7) | 1.928(12) |

**Table S14.** Selected bond angles of  $1 \cdot 2\text{H}_2\text{O}$  during heating mode @1 K min<sup>-1</sup>:

| Atoms |     |                 | Angles/°  |         |         |         |         |
|-------|-----|-----------------|-----------|---------|---------|---------|---------|
|       |     |                 | 110 K     | 120 K   | 140 K   | 168 K   | 200 K   |
| N9    | Co1 | N2 <sup>1</sup> | 85.85(15) | 86.3(2) | 86.7(3) | 85.5(2) | 85.1(4) |
| C12   | Fe1 | C2              | 94.70(19) | 96.1(3) | 96.2(3) | 93.9(3) | 90.4(4) |

**Table S15.** Octahedral Shape Analysis of  $1 \cdot 2\text{H}_2\text{O}$  during heating mode @1 K min<sup>-1</sup>:

| Metal centre | Octahedral Shape Analysis Value |       |       |       |       |
|--------------|---------------------------------|-------|-------|-------|-------|
|              | 110 K                           | 120 K | 140 K | 168 K | 200 K |
| Co           | 0.723                           | 0.507 | 0.499 | 0.786 | 1.107 |
| Fe           | 0.167                           | 0.204 | 0.213 | 0.175 | 0.108 |

**Table S16.** Octahedral distortion parameters for  $1 \cdot 2\text{H}_2\text{O}$  during cooling and heating mode @1 K min<sup>-1</sup>:

| Temperature (K) | Metal centre | <D> (Å) | Z (Å)    | Δ        | Σ (°)   | Θ (°)    |
|-----------------|--------------|---------|----------|----------|---------|----------|
| 110             | Co           | 1.9965  | 0.070066 | 0.000047 | 54.6728 | 175.5133 |
|                 | Fe           | 1.9407  | 0.298537 | 0.000708 | 26.0526 | 82.7088  |
| 120             | Co           | 1.9492  | 0.082225 | 0.000090 | 47.6205 | 152.0882 |
|                 | Fe           | 1.9376  | 0.342168 | 0.000956 | 30.3329 | 91.5087  |
| 140             | Co           | 1.9491  | 0.097277 | 0.000104 | 49.3176 | 154.9531 |
|                 | Fe           | 1.9349  | 0.350755 | 0.001005 | 31.6110 | 92.9399  |
| 168             | Co           | 2.0169  | 0.056827 | 0.000034 | 59.0672 | 186.9598 |
|                 | Fe           | 1.9385  | 0.275537 | 0.000614 | 26.2375 | 83.8221  |
| 200             | Co           | 2.1095  | 0.049495 | 0.000023 | 70.4376 | 213.3041 |
|                 | Fe           | 1.9383  | 0.157658 | 0.000284 | 20.6208 | 63.8449  |

**Table S17.** Hydrogen bonding interactions in  $1 \cdot 2\text{H}_2\text{O}$  during heating mode @1 K min<sup>-1</sup>:

| HB interactions (Å)                  | 110 K | 120 K | 140 K | 168 K | 200 K |
|--------------------------------------|-------|-------|-------|-------|-------|
| N <sub>NH2</sub> ...O <sub>H2O</sub> | 2.807 | 2.795 | 2.784 | 2.812 | 2.855 |
| N <sub>CN</sub> ...O <sub>H2O</sub>  | 2.799 | 2.796 | 2.785 | 2.825 | 2.869 |

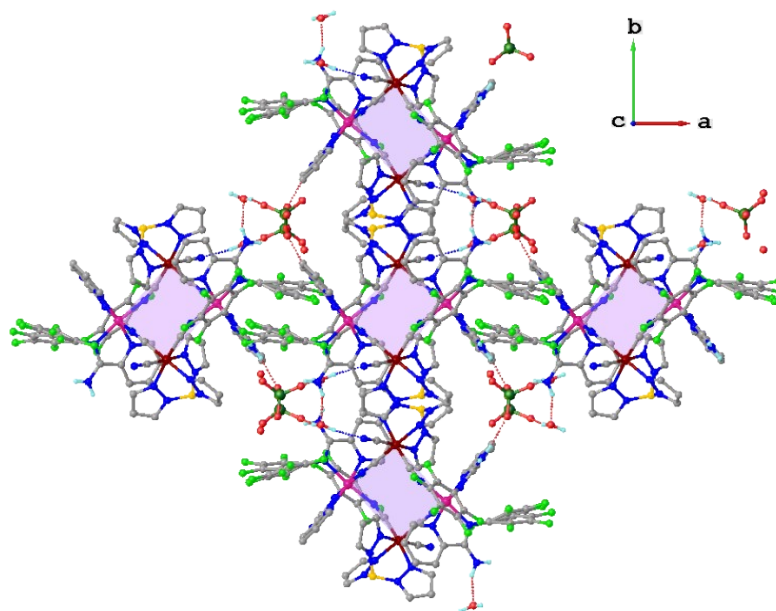**Figure S4.** Hydrogen bonding interactions between solvent molecules, perchlorate anions and the  $[\text{Fe}_2(\mu\text{-CN})\text{Co}_2]$  square grids along the *ab* plane in complex  $1 \cdot 2\text{H}_2\text{O}$ . The Hydrogen atoms not involved in Hydrogen bonding have been omitted for clarity.

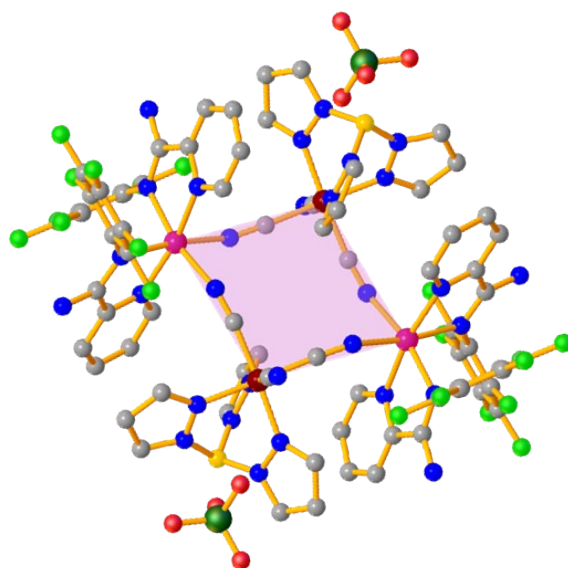

### 2.3. Crystal structure determination of 1:

**Figure S5.** Crystal Structure of **1**. Colour Code: Green: Fe; Pink: Co; Blue: N; Grey: C; Yellow: B, Dark green: Cl, Light green: F. The hydrogen not involved in H-bonding is omitted for clarity.

**Table S18.** Crystallographic data of **1**:

| Identification code                  | <b>1</b>                                                                              |
|--------------------------------------|---------------------------------------------------------------------------------------|
| Empirical formula                    | C <sub>36</sub> H <sub>22</sub> BClCoF <sub>10</sub> FeN <sub>15</sub> O <sub>4</sub> |
| Formula weight                       | 1079.72                                                                               |
| Temperature/K                        | 117.0                                                                                 |
| Crystal system                       | monoclinic                                                                            |
| Space group                          | P2 <sub>1</sub> /c                                                                    |
| a/Å                                  | 14.768(3)                                                                             |
| b/Å                                  | 22.615(6)                                                                             |
| c/Å                                  | 14.318(4)                                                                             |
| α/°                                  | 90                                                                                    |
| β/°                                  | 109.286(5)                                                                            |
| γ/°                                  | 90                                                                                    |
| Volume/Å <sup>3</sup>                | 4513.6(19)                                                                            |
| Z                                    | 4                                                                                     |
| ρ <sub>calc</sub> /g/cm <sup>3</sup> | 1.589                                                                                 |
| R <sub>1</sub> <sup>a</sup>          | 0.0707                                                                                |
| wR <sub>2</sub> <sup>a</sup>         | 0.1738                                                                                |

**Table S19.** Selected bond lengths of **1** at 117 K:

| Atom | Atom            | Bond length/Å |
|------|-----------------|---------------|
| Co1  | N15             | 2.126(6)      |
| Co1  | N12             | 2.103(6)      |
| Co1  | N2 <sup>1</sup> | 2.112(6)      |
| Co1  | N13             | 2.104(6)      |
| Co1  | N9              | 2.114(6)      |
| Co1  | N10             | 2.127(6)      |
| Fe1  | N6              | 1.968(6)      |
| Fe1  | N8              | 1.976(6)      |
| Fe1  | N3              | 1.965(6)      |
| Fe1  | C2              | 1.900(8)      |
| Fe1  | C1              | 1.929(8)      |
| Fe1  | C12             | 1.896(8)      |

**Table S20.** Selected bond angles of **1** at 117 K:

| Atoms | Angles/° |
|-------|----------|
|-------|----------|

|     |     |                 |         |
|-----|-----|-----------------|---------|
| N9  | Co1 | N2 <sup>1</sup> | 85.5(2) |
| C12 | Fe1 | C2              | 90.6(3) |

**Table S21.** Octahedral Shape Analysis of **1** at 117 K:

| Octahedral Shape Analysis Value |       |
|---------------------------------|-------|
| Metal centre                    | 117 K |
| Co                              | 1.137 |
| Fe                              | 0.093 |

**Table S22.** Octahedral distortion parameters for **1** at 117 K:

| Metal centre | <D> (Å) | Z (Å)    | $\Delta$ | $\Sigma$ (°) | $\Theta$ (°) |
|--------------|---------|----------|----------|--------------|--------------|
| Co           | 2.1142  | 0.048023 | 0.000019 | 70.9624      | 211.9373     |
| Fe           | 1.9388  | 0.182791 | 0.000277 | 19.5784      | 61.4659      |

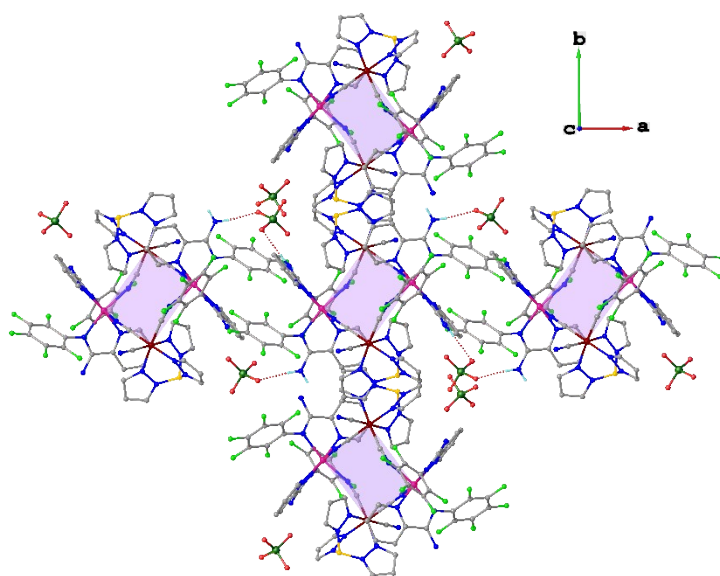

**Figure S6.** Hydrogen bonding interactions between solvent molecules, perchlorate anions and the  $[\text{Fe}_2(\mu\text{-CN})\text{Co}_2]$  square grids along the  $ab$  plane in complex **1**. The Hydrogen atoms not involved in Hydrogen bonding have been omitted for clarity.

#### 2.4. Structure overlay:

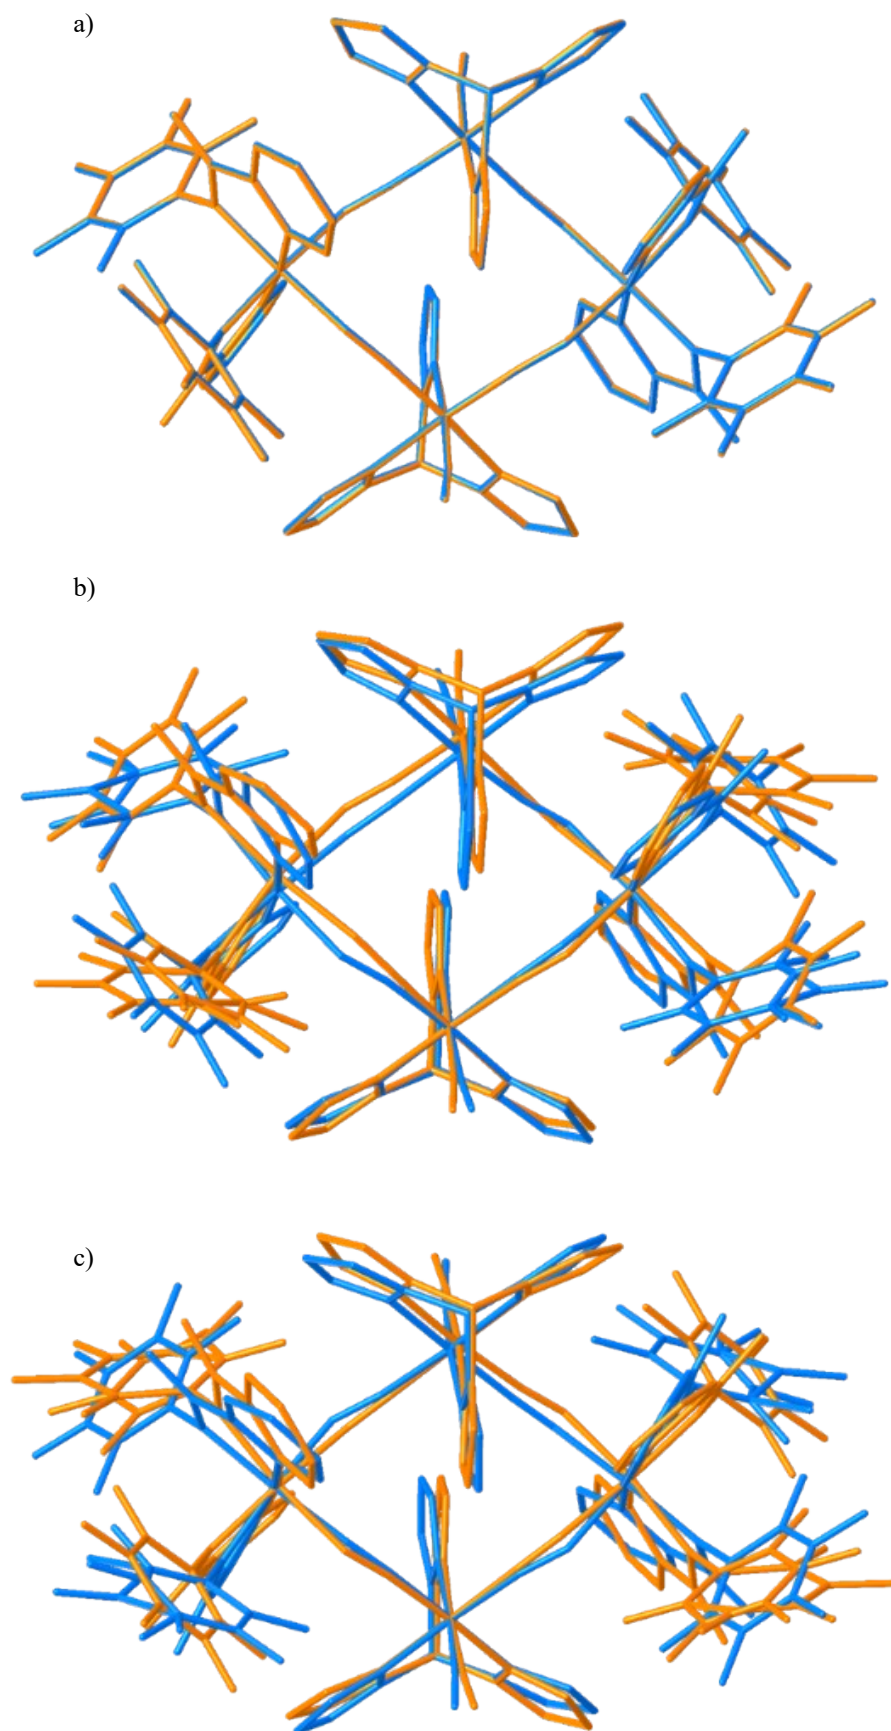

**Figure S7.** Overlay diagram of a)  $1 \cdot 4\text{MeOH} \cdot 2\text{H}_2\text{O}$  (blue: 100 K, orange: 200 K) and b)  $1 \cdot 2\text{H}_2\text{O}$  (blue: 140 K, orange: 200 K) and c)  $1 \cdot 2\text{H}_2\text{O}$  (blue: 140 K, orange: 110 K). The Hydrogen atoms are omitted for clarity.

## 2.5. Thermogravimetric analysis:

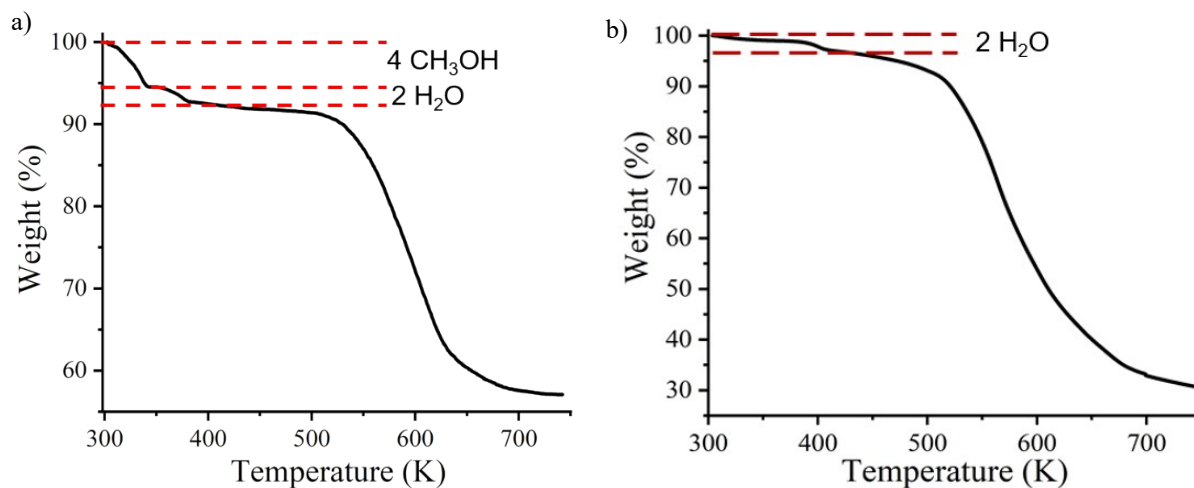

**Figure S8.** Thermogravimetric analysis of a)  $1 \cdot 4\text{MeOH} \cdot 2\text{H}_2\text{O}$ , b)  $1 \cdot 2\text{H}_2\text{O}$  and c) **1** representing loss of solvent molecules.

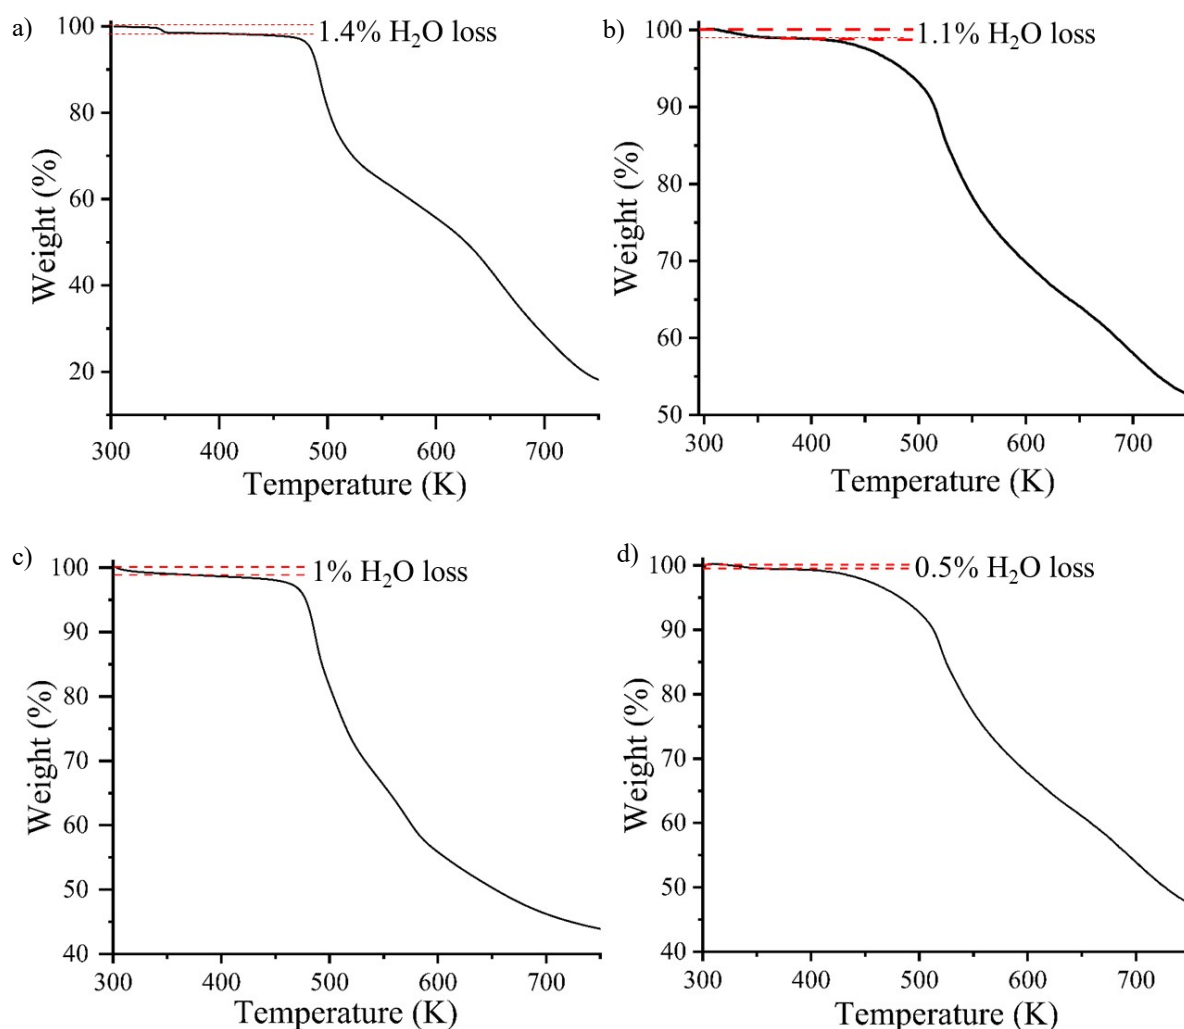

**Figure S9.** Thermogravimetric analysis of  $1 \cdot 2\text{H}_2\text{O}$  after a) 2 days, b) 1 week, c) 2 weeks and d) 4 weeks.

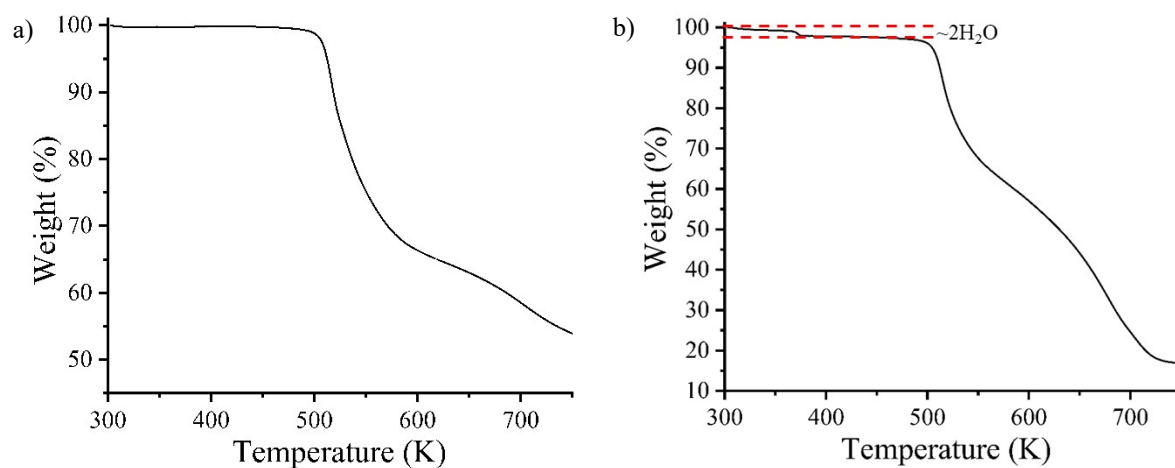

**Figure S10.** Thermogravimetric analysis of **1** (a) and resolvated complex (b).

## 2.6. Infrared spectroscopy study:

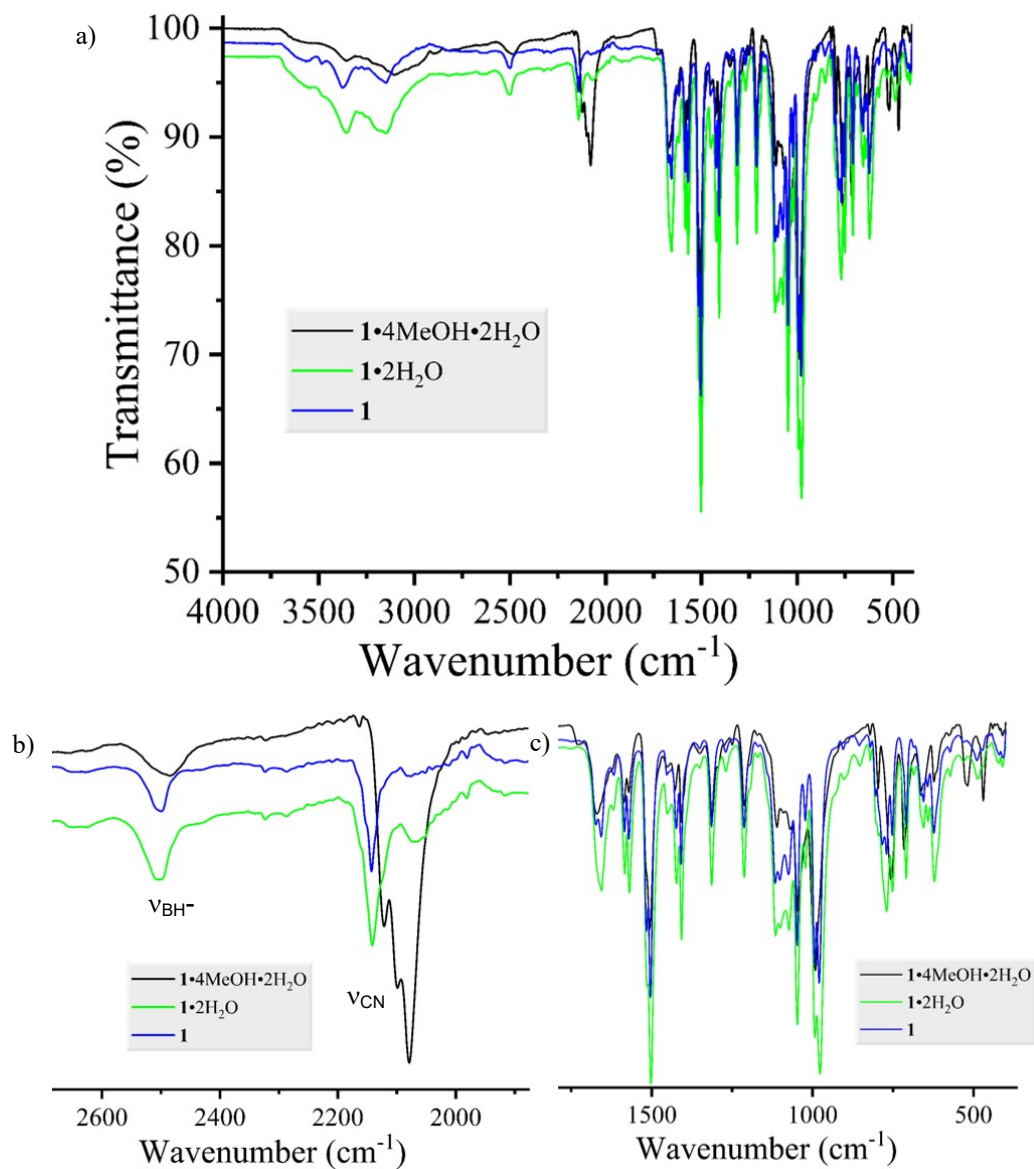

**Figure S11.** a) Infrared spectroscopy of  $1 \cdot 4\text{MeOH} \cdot 2\text{H}_2\text{O}$ ,  $1 \cdot 2\text{H}_2\text{O}$  and  $1$ . Enlarged view of b)  $\text{BH}^-$  and  $\text{CN}$  frequency region and c) 1750 – 400  $\text{cm}^{-1}$ .

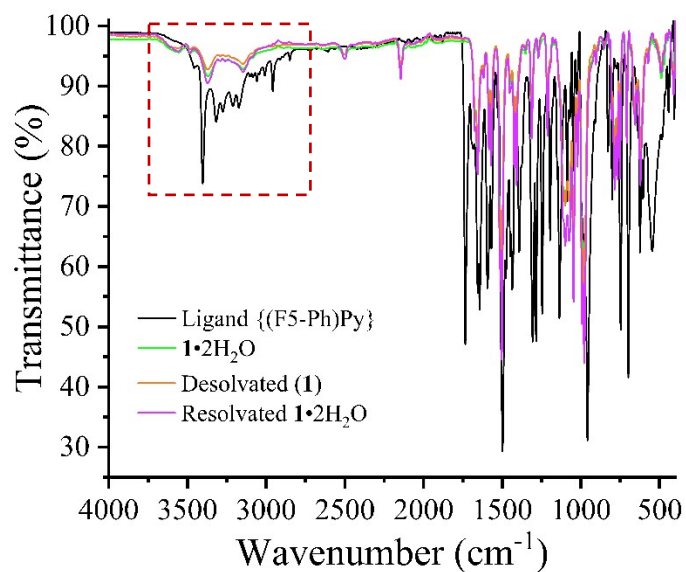

**Figure S12.** Infrared spectroscopy of ligand,  $1 \cdot 2\text{H}_2\text{O}$ , desolvated and the resolvated complex.

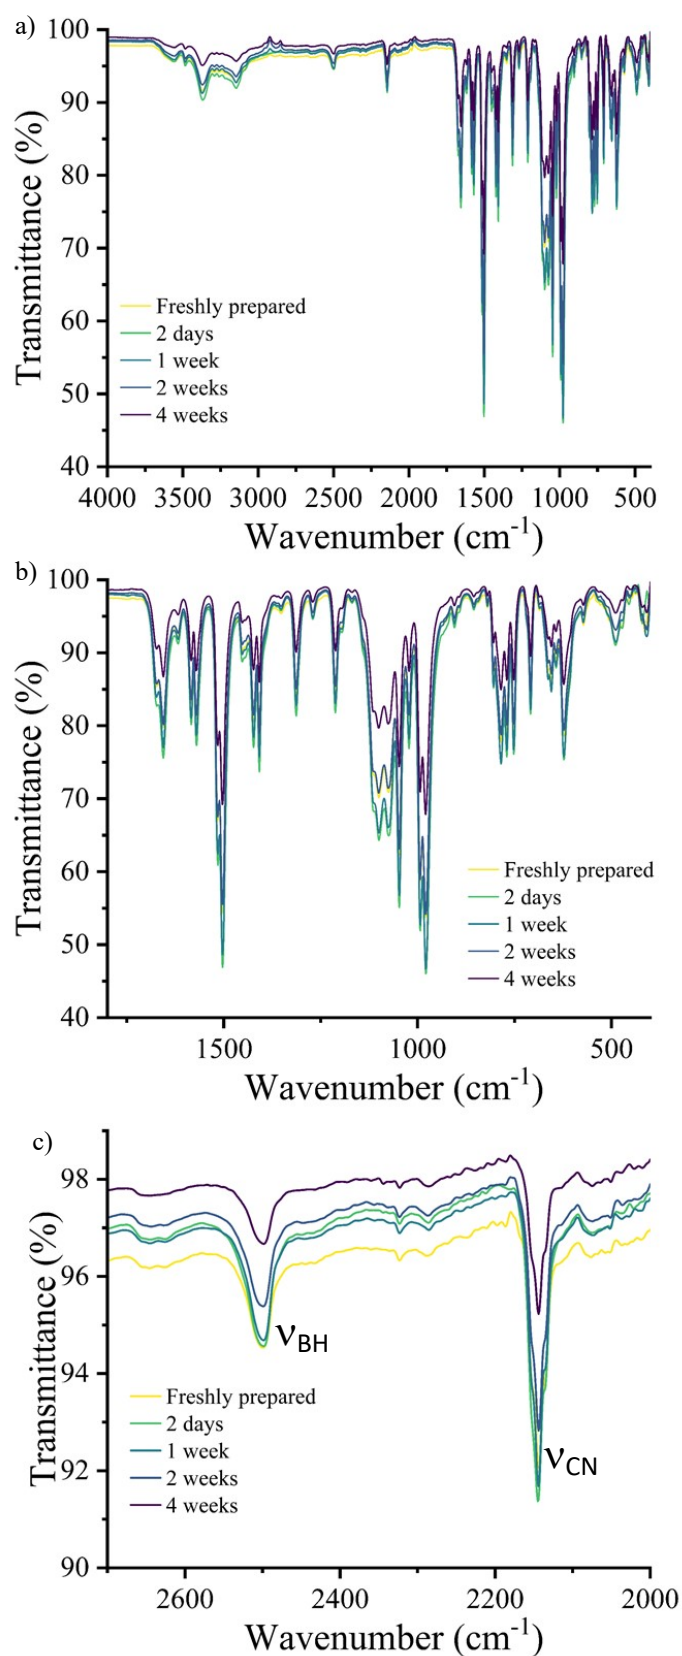

**Figure S13.** Infrared spectroscopy of  $1 \cdot 2\text{H}_2\text{O}$  with ageing a) complete spectra from 4000-400  $\text{cm}^{-1}$ , b) fingerprint region (1800-400  $\text{cm}^{-1}$ ), and c)  $\nu_{\text{BH}}$  and  $\nu_{\text{CN}}$  stretching frequencies.

## 2.7. Magnetic study:

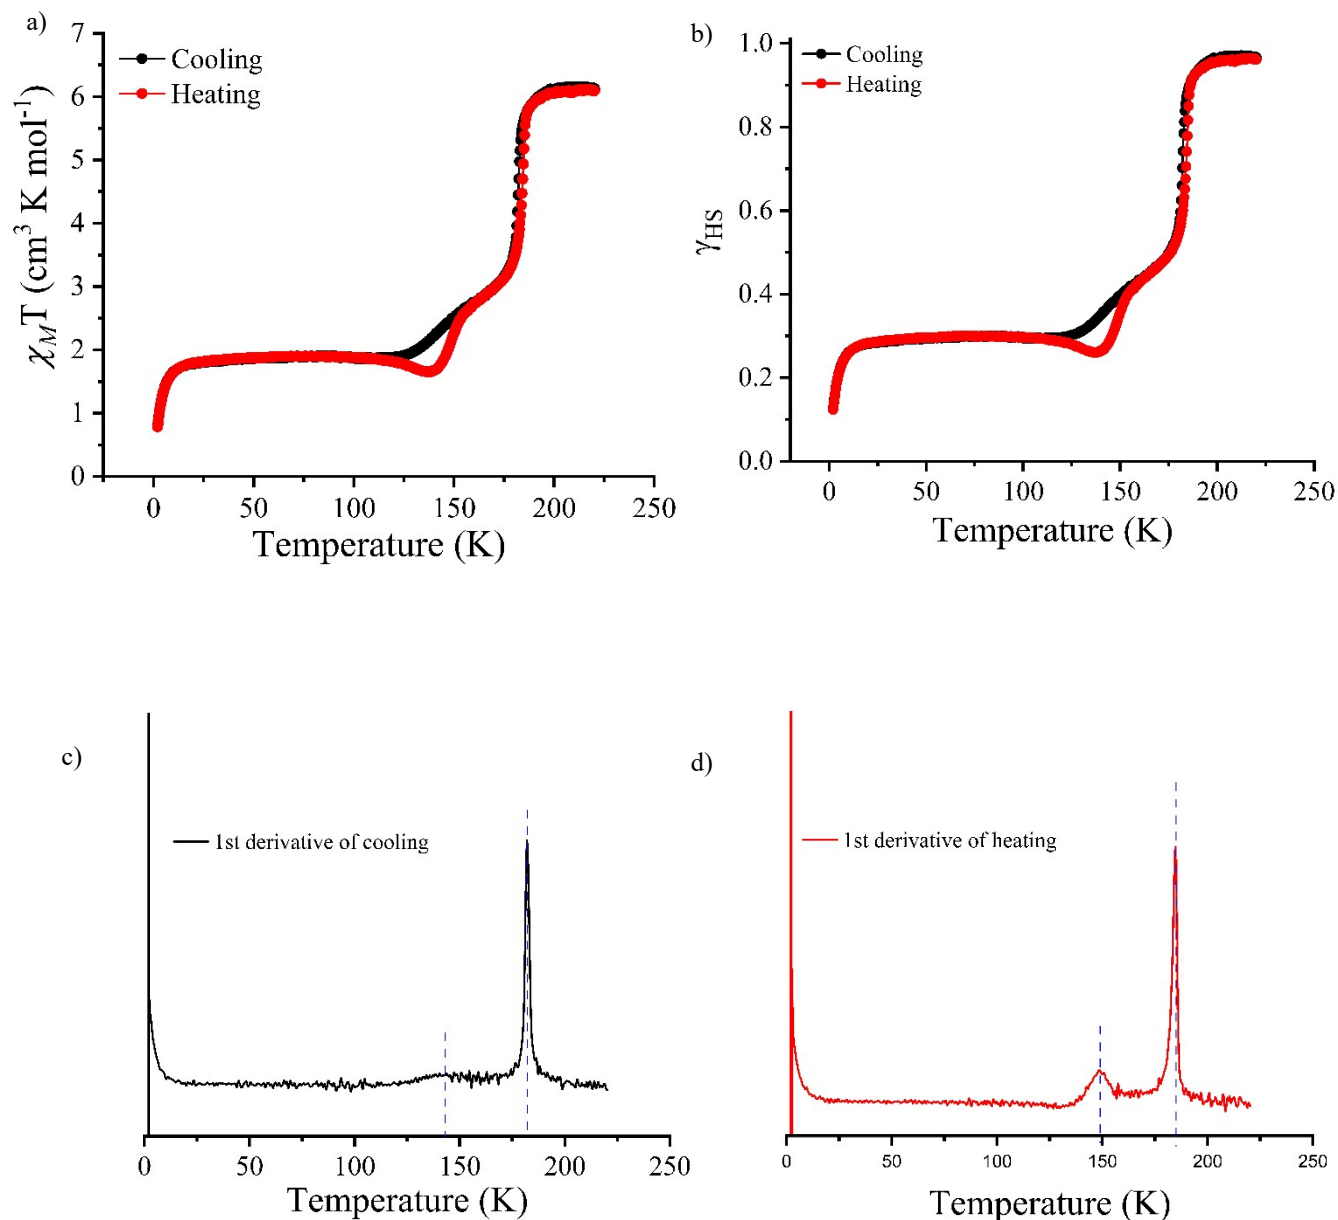

**Figure S14.** a)  $\chi_M T$  vs. T (black), b)  $\gamma_{HS}$  vs. T and c) and d) are the derivative plots during cooling and heating, respectively, for complex **1**·2H<sub>2</sub>O at 5 K min<sup>-1</sup> with applied DC field of 1000 Oe. The separate derivative plot for the complex during the cooling and heating cycle (b and c, respectively).

The HS fraction ( $\gamma_{HS}$ ) with temperature is calculated from the equation:

$$\gamma_{HS} = \frac{(\chi_M T)_m - (\chi_M T)_{LS}}{(\chi_M T)_{HS} - (\chi_M T)_{LS}} \dots (1)$$

Here,  $(\chi_M T)_m$  corresponds to the  $\chi_M T$  value at any measured temperature and  $(\chi_M T)_{HS}$  and  $(\chi_M T)_{LS}$  represent the  $\chi_M T$  values at absolutely populated HS and low spin species of the molecule, respectively.<sup>5</sup>

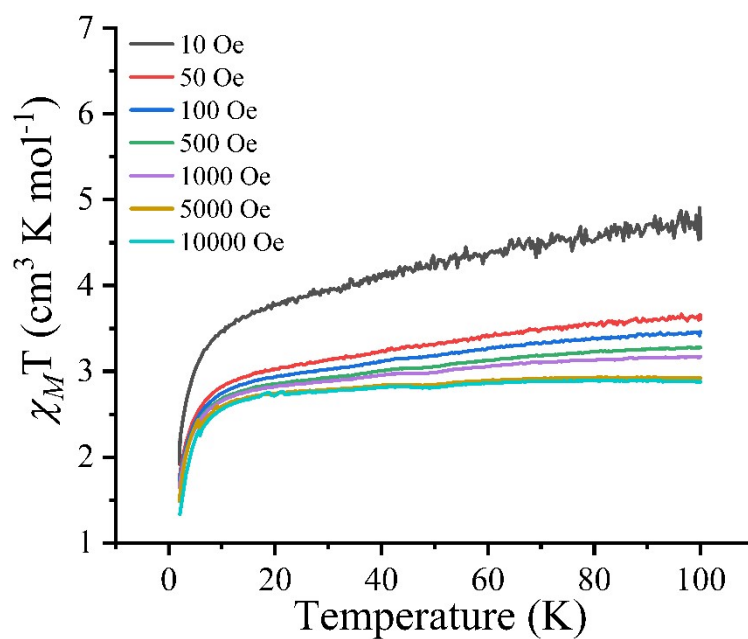

**Figure S15.**  $\chi_M T$  vs.  $T$  plots for complex **1**·2H<sub>2</sub>O at 5 K min<sup>-1</sup> under different applied magnetic field from 10 Oe to 10000 Oe from 2-100 K.

The variation in  $\chi_M T$  values observed at 100 K between the two samples in Figures S14 and S15 may be due to multiple measurements performed using the same sample, leading to minor changes in the solvent content over time.

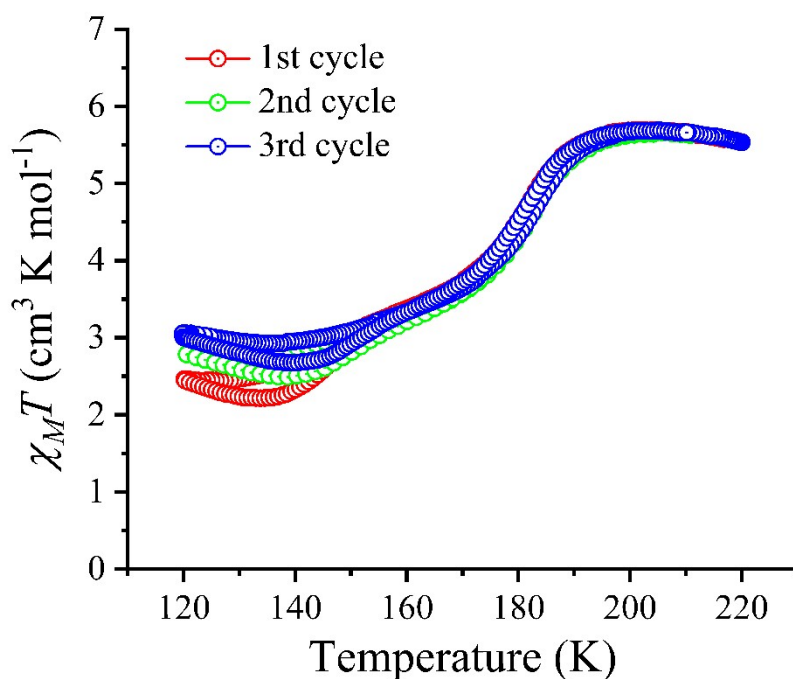

**Figure S16.**  $\chi_M T$  vs.  $T$  plot at a scan rate of 5 K min<sup>-1</sup> for complex **1**·2H<sub>2</sub>O with three consecutive cycles upon resolution.

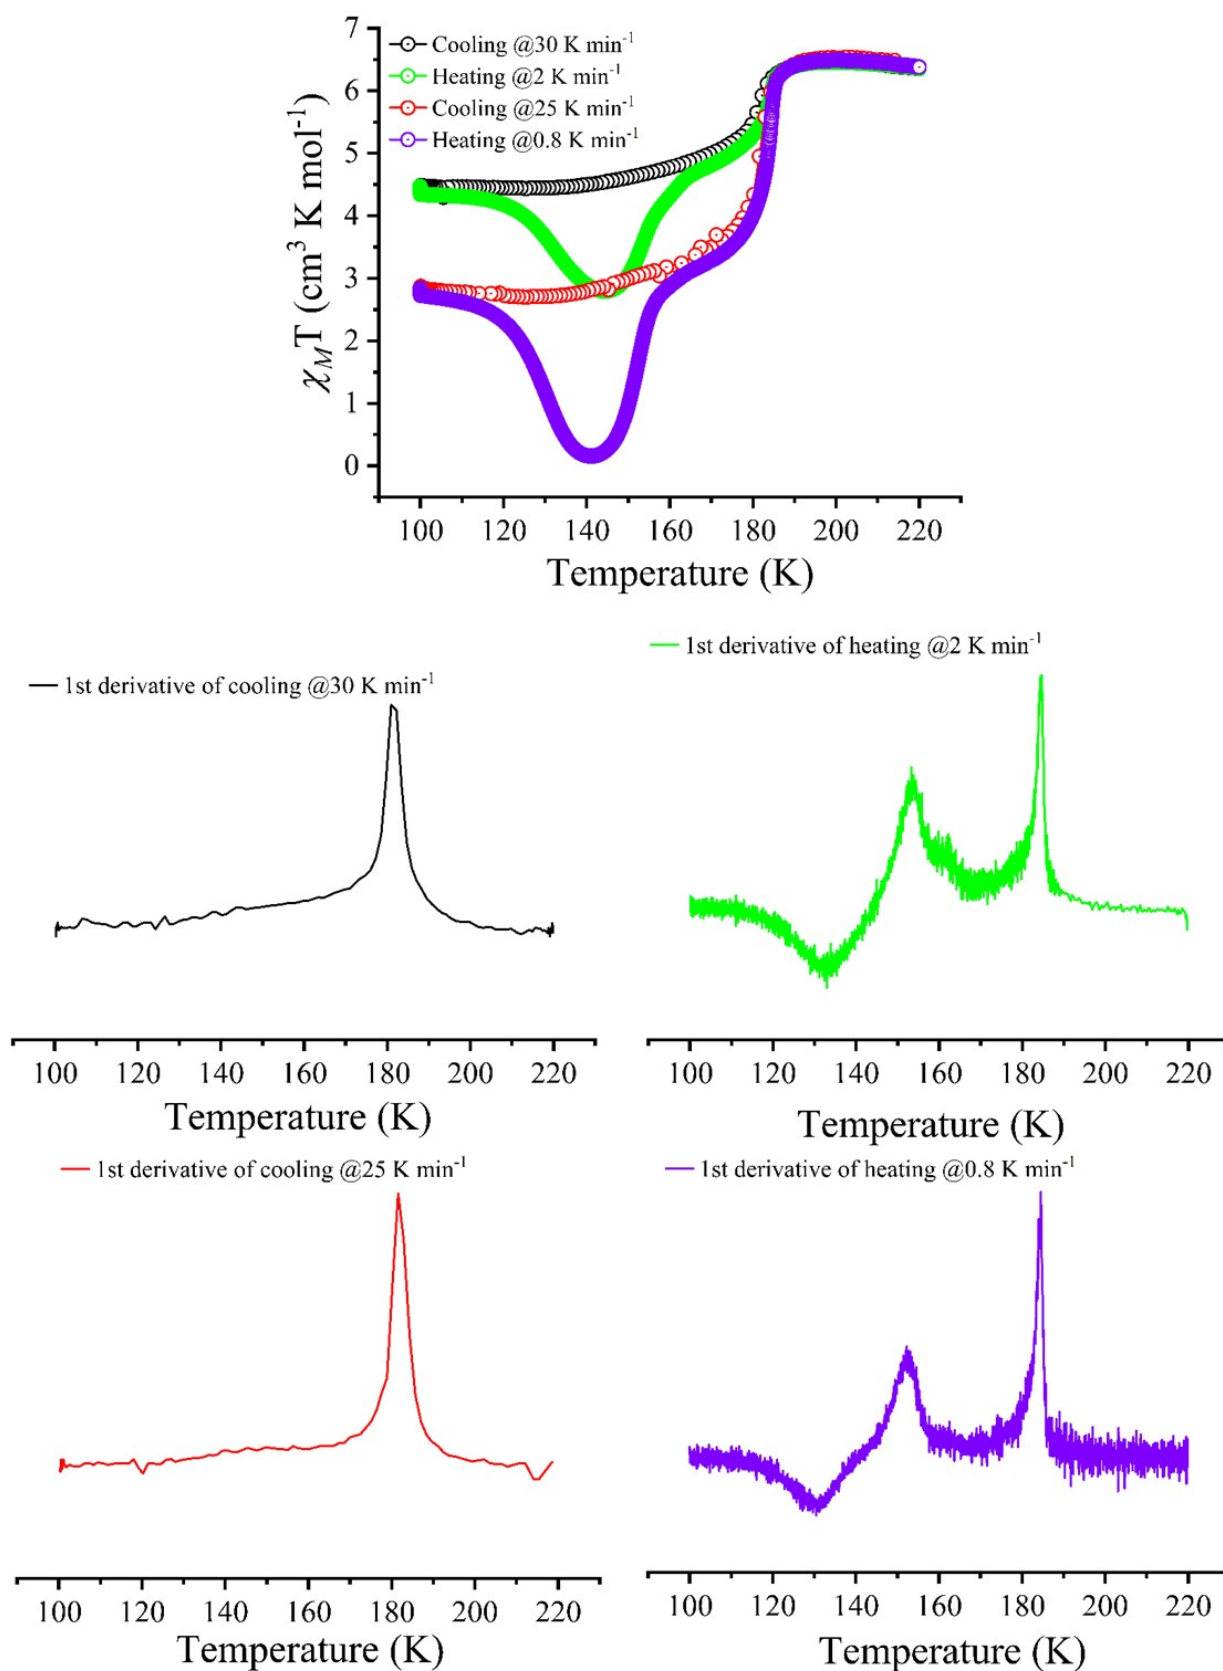

**Figure S17.**  $\chi_M T$  vs.  $T$  plots for complex  $1 \cdot 2\text{H}_2\text{O}$  upon thermal quenching with a scan rate of 25  $\text{K min}^{-1}$  (black) and 30  $\text{K min}^{-1}$  (red) via TIESST phenomenon. Heating was measured at a scan rate of 0.8  $\text{K min}^{-1}$  (black) and 2  $\text{K min}^{-1}$  (red). The 1<sup>st</sup> derivative plots during cooling and heating mode is shown in their representative colours with single-step and two-step transitions, respectively.

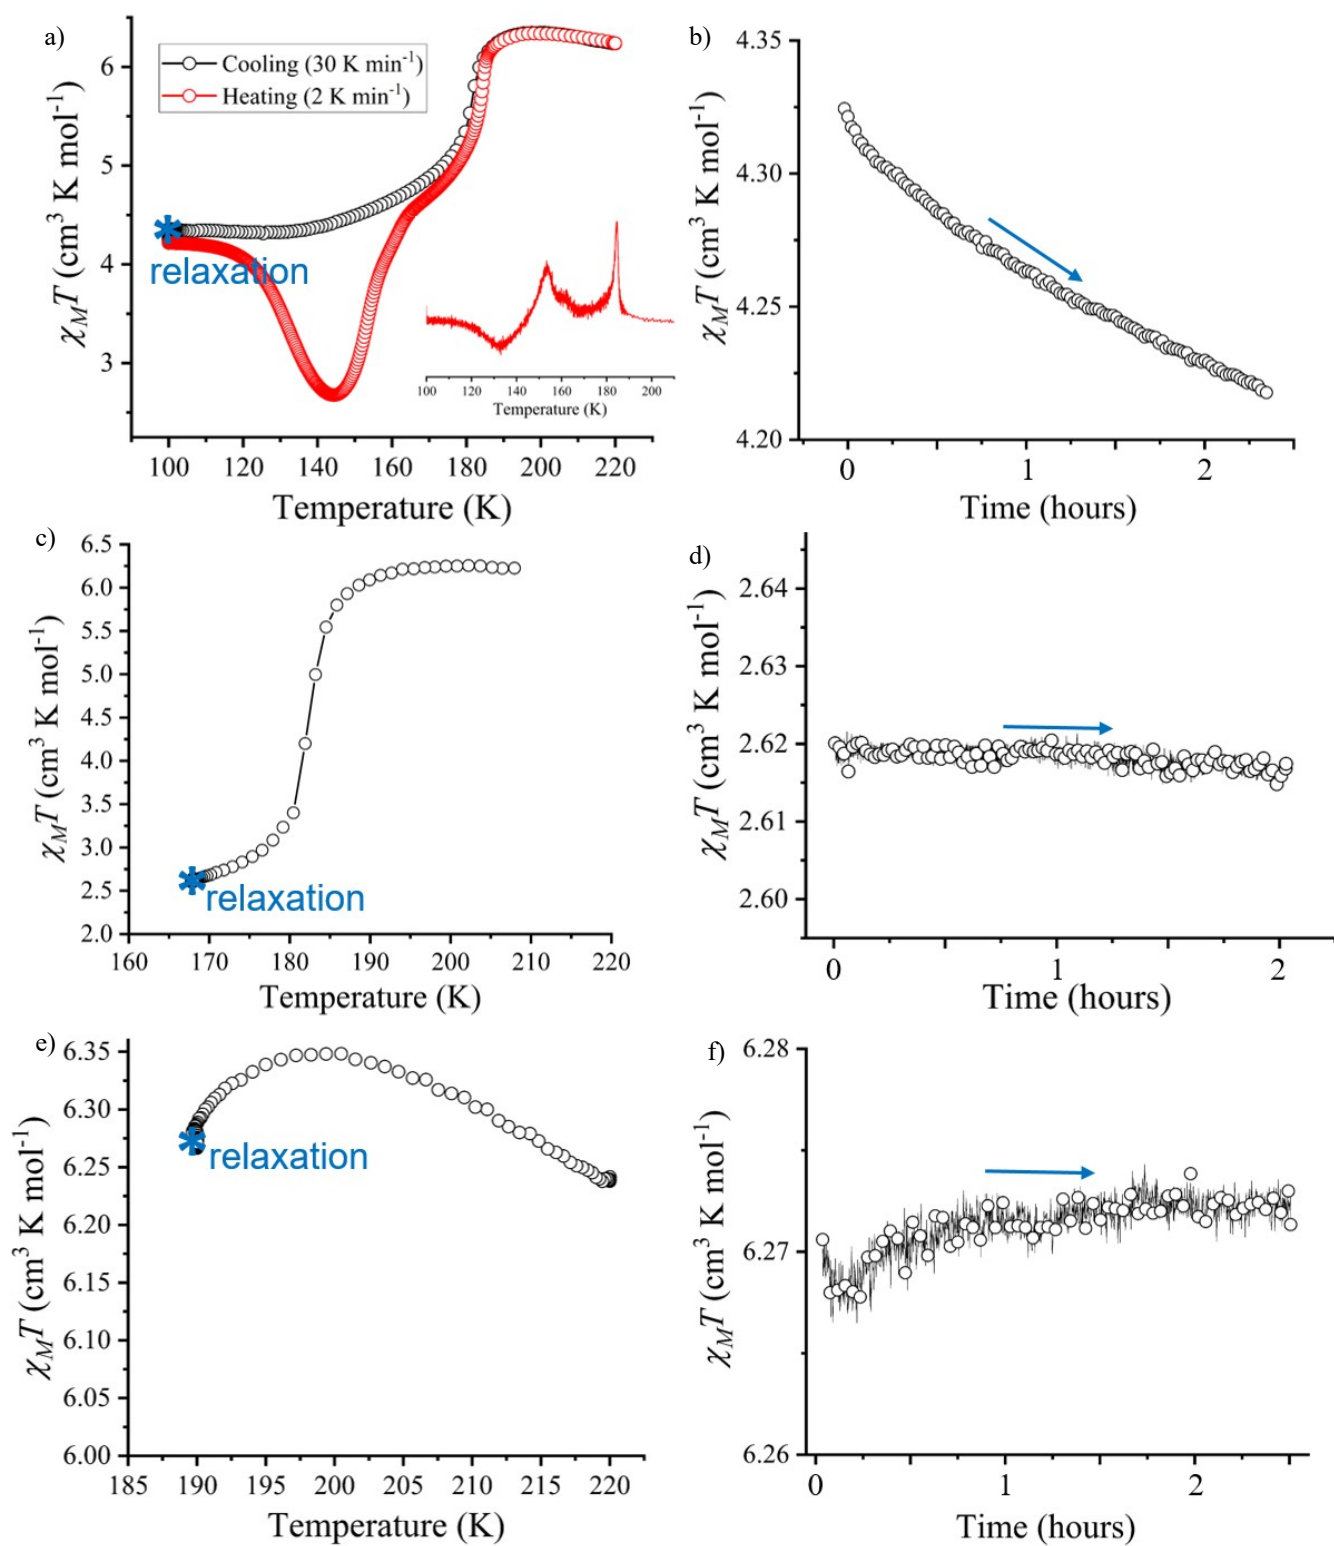

**Figure S18.**  $\chi_M T$  vs.  $T$  plots for complex  $1 \cdot 2\text{H}_2\text{O}$  upon thermal quenching with a scan rate of 30 K min<sup>-1</sup> upto a) 100 K, c) 168 K and e) 190 K followed by relaxation for about 2 hours at constant temperatures. b), d) and f)  $\chi_M T$  vs. time plots at 100 K, 168 K and 190 K, respectively. Inset of a) shows the 1<sup>st</sup> derivative of heating cycle showing not so prominent three step-transition.

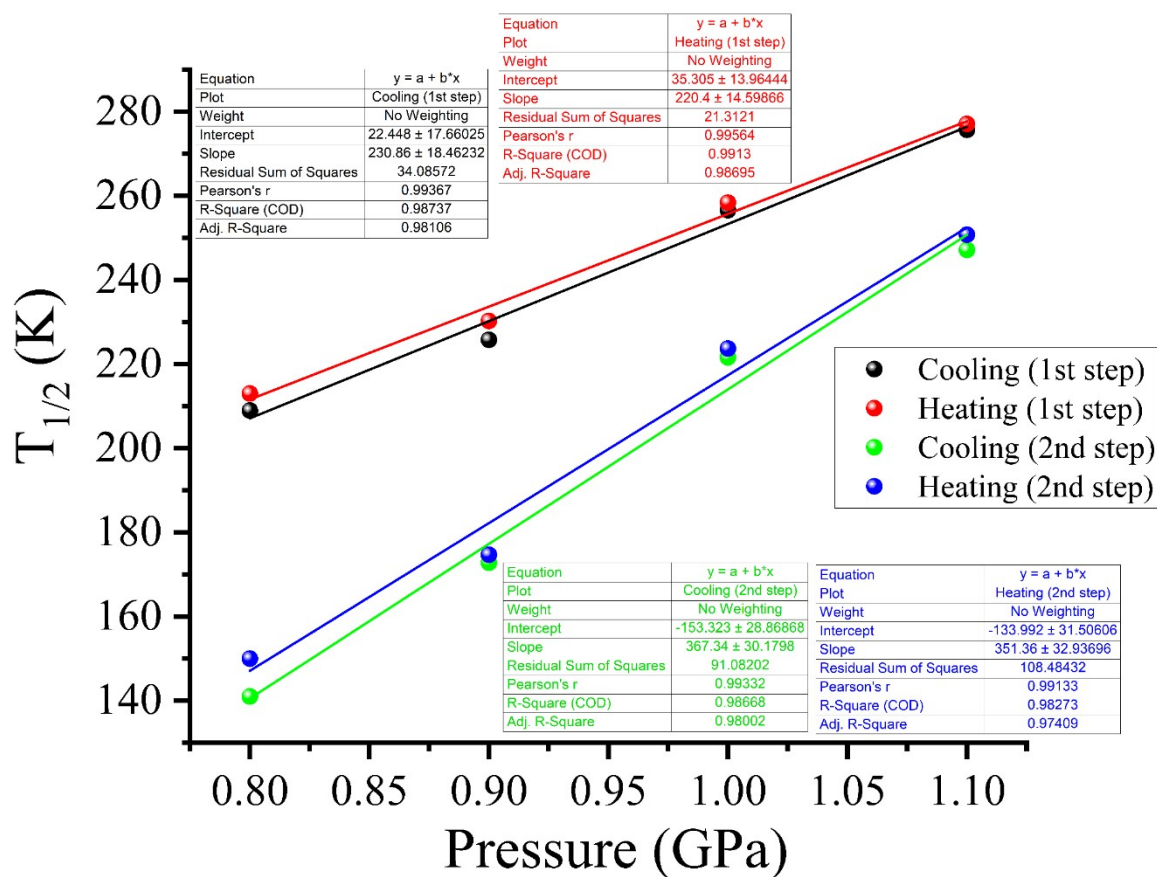

**Figure S19.**  $T_{1/2}$  vs. Pressure plots for complex **1**·2H<sub>2</sub>O showing linear relation above 0.8 GPa of threshold pressure, following Clayperon law.

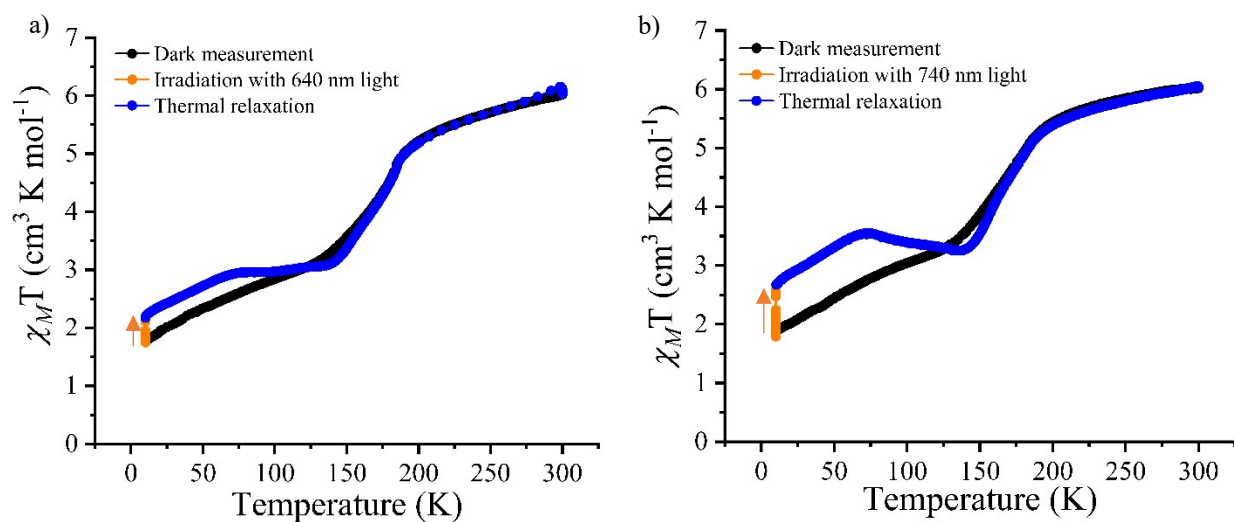

**Figure S20.**  $\chi_M T$  vs. Temperature plots for complex **1**·2H<sub>2</sub>O with irradiation with a) 640 nm and b) 740 nm of light (orange). The cooling rate is 5 K min<sup>-1</sup> (black) and after irradiation, the heating is at 2 K min<sup>-1</sup> (blue).

## References

- (1) J. Kim, S. Han, I.-K. Cho, K. Y. Choi, M. Heu, S. Yoon, and B. J. Suh, *Polyhedron*, 2004, **23**, 1333-1339.
- (2) O. V. Dolomanov, L. J. Bourhis, R. J. Gildea, J. A. K. Howard, and H. Puschmann, *J. Appl. Cryst.*, 2009, **42**, 339-341.
- (3) R. Ketkaew et al. Octadist. 2019.
- (4) L. D. Marco, W. Carpenter, H. Liu, R. Biswas, J. M. Bowman, A. Tokmakoff, *J. Phys. Chem. Lett.*, 2016, **7**, 1769-1774.
- (5) J. Yadav, D. J. Mondal and S. Konar, *Chem. Commun.*, 2021, **57**, 5925-5928.
